1 **Title:**

2 **Methionine coordinates a hierarchically organized anabolic program enabling**  
3 **proliferation**

4 Adhish S. Walvekar<sup>1</sup>, Rajalakshmi Srinivasan<sup>1</sup>, Ritu Gupta<sup>1</sup> and Sunil Laxman<sup>1\*</sup>

5 <sup>1</sup>Institute for Stem Cell biology and Regenerative Medicine,

6 NCBS-TIFR campus, GKVK Post, Bellary Road, Bangalore 560065.

7 \* Correspondence: [sunil@instem.res.in](mailto:sunil@instem.res.in)

8

9

10 Keywords: methionine, Gcn4, growth, pentose phosphate pathway, NADPH, reductive  
11 biosynthesis, PLP

## 12 **Abstract**

13 Methionine availability during overall amino acid limitation metabolically reprograms cells  
14 to support proliferation, the underlying basis for which remains unclear. Here, we construct  
15 the organization of this methionine mediated anabolic program, using yeast. Combining  
16 comparative transcriptome analysis, biochemical and metabolic flux based approaches, we  
17 discover that methionine rewires overall metabolic outputs by increasing the activity of three  
18 key regulatory nodes. These are: the pentose phosphate pathway coupled with reductive  
19 biosynthesis, and overall transamination capacity, including the synthesis of  
20 glutamate/glutamine. These provides the cofactors or substrates that enhance subsequent rate-  
21 limiting reactions in the synthesis of costly amino acids, and nucleotides, which are also  
22 induced in a methionine dependent manner. This thereby results in a biochemical cascade  
23 establishing an overall anabolic program. For this methionine mediated anabolic program  
24 leading to proliferation, cells co-opt a “starvation stress response” regulator, Gcn4p.  
25 Collectively, our data suggest a hierarchical metabolic framework explaining how methionine  
26 mediates an anabolic switch.

27

## 28 **Introduction**

29 Cell growth is expensive, and is therefore tightly co-ordinated with the intrinsic  
30 cellular metabolic state. In general, the enormous metabolic costs incurred during growth and  
31 proliferation come from two well-studied phenomena. First, to successfully complete  
32 division, a cell makes substantial metabolic investments, in order to replicate its genome, and  
33 synthesize building blocks like amino acids, lipids, nucleotides, and other macromolecules<sup>1</sup>.  
34 Second, the process of protein synthesis required for growth itself consumes large amounts of  
35 energy<sup>2,3</sup>, as the translational output of cells increases<sup>4</sup>. Understanding such changes in

36 cellular metabolic state coupled to global biosynthetic outputs, in the context of commitments  
37 to cell growth and proliferation are now the focus of several studies<sup>5-9</sup>. For example, one  
38 context where there is intense interest in understanding metabolic alterations enabling growth  
39 is in cancers, where phenomena ranging from the Warburg effect<sup>10,11</sup>, to the identification of  
40 the biosynthetic and metabolic requirements for cell growth<sup>11-13</sup> are studied. Yet, given the  
41 overall complexity of metabolic rewiring, understanding how specific, “sentinel” metabolites  
42 can function directly as growth signals, and identifying the core, necessary steps by which  
43 such metabolites can reprogram cells to an anabolic state, has been challenging.

44         However, simple, tractable cellular models can be used to dissect and deconvolute  
45 such complex phenomena. Studies using *Saccharomyces cerevisiae* have been particularly  
46 instrumental in identifying dedicated, conserved strategies utilized by eukaryotic cells to  
47 integrate metabolic state with growth<sup>5,6,8,9,14-19</sup>. In such reductive studies using yeast,  
48 preferred carbon or nitrogen sources are typically limited (thereby slowing down overall  
49 growth). Subsequently, specific factors are reintroduced individually or in combination. This  
50 thereby reconstitutes minimal components required for reprogramming cells to an anabolic  
51 state, and allows the precise identification of necessary components, or dissection of  
52 mechanistic events. Such approaches have discovered novel nutrient sensing systems, and  
53 mechanisms by which growth outputs are controlled by the build-up and utilization of  
54 specific metabolites<sup>8,9,25-27,15,17,18,20-24</sup>.

55         Interestingly, some amino acids directly function as anabolic signals, potently  
56 activating growth pathways independent of their roles as nitrogen or carbon sources. For  
57 example, leucine and glutamine activate the TOR pathway directly<sup>28,29</sup>. In this context,  
58 studies from diverse organisms, observed over many decades suggest that methionine is a  
59 strong growth signal, or “growth metabolite”<sup>25,30-36</sup>. The most direct evidence for methionine  
60 as a growth signal come from recent studies in yeast. When *S. cerevisiae* are shifted from

61 complex, amino acid replete medium with lactate as the carbon source, to a minimal medium  
62 with the same carbon source, the addition of methionine alone (likely through its metabolite  
63 S-adenosylmethionine (SAM)), strongly promotes growth and proliferation<sup>17,25,26,37,38</sup>. Thus,  
64 even during otherwise overall nutrient limitation, methionine can induce proliferation.  
65 Despite these advances, two fundamental, related questions regarding methionine as a growth  
66 signal remain unanswered. First, what is the biochemical logic of the methionine mediated  
67 anabolic program (i.e. how does methionine result in an anabolic reprogramming)? Second,  
68 what is the mechanism by which methionine mediates this anabolic rewiring, even in overall  
69 amino acid limiting conditions? We address these related questions in this study.

70 Here, using a minimal, reconstitutive system in yeast, and a biochemical first-  
71 principles approach, we uncover how methionine uniquely rewires cells to an anabolic state,  
72 even in otherwise amino acid limited conditions. We find that methionine activates very  
73 specific metabolic nodes in order to mediate this anabolic reprogramming. When these nodes  
74 are coincidentally activated, they further induce a cascade of dependent metabolic processes  
75 leading to the overall biosynthesis of “costly” amino acids and nucleotides. For appropriately  
76 executing this anabolic program and sustaining proliferation, cells co-opt Gcn4p, a mediator  
77 of a nutrient stress/survival response. Collectively, these results position methionine at the  
78 apex of an overall anabolic network, and provide an overarching, hierarchically organized  
79 metabolic logic to understand how methionine availability results in metabolic rewiring and  
80 controlling cellular metabolic state.

## 81 **Results**

### 82 **Methionine mediates a transcriptional remodelling program inducing key anabolic** 83 **nodes.**

84 When wild-type, prototrophic yeast cells are shifted from a complex, amino acid rich medium  
85 with lactate as the sole carbon source (RM), to a synthetic minimal medium containing  
86 nitrogen base and lactate (MM), they show a significant lag phase and slower growth.  
87 Supplementation with all 20 standard amino acids restores growth after this nutrient  
88 downshift<sup>25,38</sup>. Importantly, methionine supplementation alone substantially increases growth  
89 (Figure 1A), comparable to (in our hands) or better than adding all eighteen other non-sulfur  
90 amino acids (nonSAAs) together<sup>25,38</sup>. Collectively, even during otherwise overall amino acid  
91 limitation, methionine availability increases proliferation. Given that methionine is itself not  
92 a good “nutrient source” (i.e. a poor carbon or nitrogen source), and adding methionine alone  
93 cannot create a nutrient replete medium, we wondered if methionine might mediate a  
94 complete switch to an anabolic state. This is a clear metabolic supply problem that needs to  
95 be solved. Thus, we reasoned that dissecting the methionine-mediated overall transcriptional  
96 response might provide insight into the logic of the anabolic program mediated by  
97 methionine, and allow the elucidation of a core metabolic response that drives proliferation.

98 In this section we first address how methionine reprograms cells into an anabolic  
99 state, focusing on elucidating relatively early transcriptional events (before the overall  
100 proliferation is observed). We performed comprehensive RNA-seq analysis on distinct  
101 sample sets of wild-type cells- (i) RM grown, or cells shifted to (ii) MM for 2h, (iii)  
102 MM+Met for 2h (Met set), and (iv) MM+nonSAAs for 2h. Transcript reads from the  
103 biological replicates showed exceptional correlation across all conditions (Pearson correlation  
104 coefficient,  $R \geq 0.99$ ) (Figure S1). Setting a stringent cut-off, we only considered differentially

105 expressed genes with  $\geq \log_2 1.5$  fold changes (i.e.  $\sim 2.8$  fold change), and a p-value cut-off  
106  $< 10^{-4}$  for further analysis. We first compared global transcription trends in WT cells growing  
107 in RM, MM+Met or MM+nonSAAs to MM, with the focus being what happens when  
108 methionine is the sole variable. We examined overall global gene expression trends in these  
109 conditions (compared to MM), looking at the distribution of the most induced or  
110 downregulated genes (Figure 1B, Figure S2). Here, we first compared the global gene  
111 expression trends (broad trends of up- or down- regulated genes) exhibited by cells in  
112 MM+Met, to cells grown in RM or MM+nonSAAs, all relative to MM (i.e. we compared the  
113 expression profiles of the genes up/downregulated in MM+Met, to the same genes in RM or  
114 MM+nonSAAs, all baselined to these gene expression levels in MM) (Figure 1B). Notably,  
115 the MM+Met gene expression profile very closely resembled the signature of cells in RM, in  
116 contrast to the cells in MM+nonSAAs (which were nearly indistinguishable from MM)  
117 (Figure 1B, Figure S2 and S3). This suggests that methionine alone (compared to all other  
118 nonSAAs combined) is perceived by cells as a stronger anabolic cue than all non-sulfur  
119 amino acids combined, and is sufficient to switch cells into a transcriptional state resembling  
120 that of rapidly proliferating cells in RM (which is complex, amino acid rich media ideal for  
121 growth).

122 We next more closely examined the overall transcriptional response unique to  
123 methionine, by comparing transcriptomes of cells growing in MM vs MM+Met (the only  
124 variable being methionine). This comparison identified 372 genes, of which 262 genes were  
125 upregulated in the Met set (Figure 1C, Supplementary file E1). Using gene ontology (GO),  
126 these genes were grouped into related processes (Figure 1D, Figure S4A, Supplementary file  
127 E2). Given that there is an eventual growth increase in MM+Met, we expectedly observed a  
128 grouping suggesting a transcriptional induction of genes related to the core translational  
129 machinery. Additionally, GO also grouped multiple induced genes into “nucleotide

130 metabolism”, i.e. under “purine/pyrimidine” or “nucleobase and nucleotide metabolism”,  
131 along with the biosynthesis of secondary metabolites (Figure 1D). All of this would be  
132 entirely expected for any cell in a “growth/proliferative” state, since proliferation relies on  
133 increased translation and replication. Unsurprisingly therefore, the GO grouping showed a  
134 signature of a cell in a “proliferative state”.

135         However, this form of GO based grouping does not resolve the metabolic supply  
136 problem highlighted earlier. This grouping does not address the underlying metabolic logic or  
137 hierarchy of the methionine mediated anabolic response and how it might have been  
138 achieved, but rather reveals the end-point readouts for growth. We speculated that this is due  
139 to a limitation of using GO based analysis, which builds groups by looking for enriched  
140 pathway terms relying on multiple genes within a pathway to be overrepresented.  
141 Contrastingly, for metabolic changes, entire metabolic pathways need not be regulated. This  
142 is because most metabolic regulation happens by controlling only key nodes or “rate-limiting  
143 steps” in metabolism<sup>1</sup>. We therefore manually rebuilt connections and groupings using  
144 biochemical first principles, in order to attempt to put together a logical hierarchy of  
145 metabolic responses being set-up. In this reconstruction, we particularly emphasized: (i)  
146 whether the protein encoded by the gene regulated a “bottleneck” or rate-limiting metabolic  
147 step, and (ii) whether this biochemical step, and its subsequent product, was critical for  
148 multiple other biosynthetic reactions. Contrastingly, we did not worry about how many genes  
149 in a pathway are induced (i.e. GO pathway enrichment). Our reasoning was that these  
150 bottleneck nodes will not necessarily be picked up in GO enrichments, particularly if they are  
151 solitary genes, and therefore entire metabolic pathways were not transcriptionally  
152 upregulated. However, these bottleneck genes may in fact be central to understanding the  
153 metabolic state switch.

154 Through this biochemical first-principles based reconstruction, we identified and  
155 compartmentalized the metabolic response regulated by methionine into a group of key  
156 biochemical reaction nodes, as described. Only a few genes involved in classical “central  
157 carbon/carbohydrate metabolism” were upregulated in the presence of methionine, and  
158 strikingly none of them group to glycolysis, the TCA cycle or gluconeogenesis (Figure 1E).  
159 However, the genes encoding three key enzymes of the pentose phosphate pathway (PPP)  
160 (*GND1*, *RKII* and *TKLI*), which regulate four steps in the PPP, were induced in the presence  
161 of methionine. Furthermore, two other genes (*SOL3* and *TALI*), which control two other steps  
162 in the PPP, were also induced by methionine (at just below the log<sub>2</sub> 1.5 fold (~2.8 fold)  
163 arbitrary cut-off limit we had set) (Figure 1E). Gnd1p catalyzes the last step in the oxidative  
164 arm of the PPP, generating NADPH and producing ribulose-5-phosphate. Most of the genes  
165 of the non-oxidative arm of the PPP, which make ribose-5-phosphate and other critical  
166 intermediates, were also upregulated. Additionally, *HXK2*, encoding a hexokinase was  
167 upregulated when methionine is present. While this is not even classified under the PPP by  
168 GO grouping, this enzyme produces glucose-6-phosphate, which is the substrate for the first,  
169 rate-limited step of the PPP, and so we included it under the PPP in our grouping (Figure 1E).  
170 Thus, only the PPP arm of carbon metabolism was transcriptionally induced by methionine.  
171 Second, we noted that key regulator resulting in the formation of pyridoxal-5-phosphate or  
172 PLP (encoded by *SNO1*), was induced by methionine (Figure 1E). PLP is a central cofactor,  
173 required for all transamination reactions<sup>1</sup>, but notably does not get a GO grouping because it  
174 does not fall in a large pathway/group. Third, transcripts of Gdh1p, which regulates the key  
175 nitrogen assimilation reaction resulting in the formation of glutamate (and *GLN1*, which is  
176 further required to make glutamine), was highly induced in methionine (Figure 1E). This  
177 reaction requires NADPH (which is itself produced in the PPP), and importantly is also  
178 critical for the subsequent formation of all other amino acids, and nucleotides (Figure 1E).



179 Thus, this grouping suggested that methionine induced a PPP-GDH-PLP metabolic node. We  
180 hypothesized that this PPP-GDH-PLP node could be central for all the subsequent,  
181 downstream anabolic outputs.

182

### 183 **Methionine sets-up a hierarchical metabolic response leading to anabolism.**

184 We therefore inspected our transcriptome data for the other genes upregulated by  
185 methionine, which could be grouped broadly under “amino acid biosynthesis”, “nucleotide  
186 synthesis”, and “oxidoreduction/transamination” categories, particularly focusing on the  
187 substrates or co-factors required for their function. Notably, only a few genes in each of these  
188 large, multi-step, multi-enzyme pathways were induced. However, when organized by their  
189 biochemical requirements, essentially all enzymes encoded by this set of methionine-  
190 upregulated genes utilized either a PPP intermediate/product, and/or NADPH, and/or  
191 glutamate/glutamine, or combinations of all of these, i.e. products coming from the PPP-  
192 GDH-PLP nodes (Figure 2A). We next more closely examined the steps in the respective  
193 biosynthetic pathways that these genes regulated (coming from Figure 2A). For this, we  
194 further categorized all steps in the amino acid biosynthesis pathway as either the rate-  
195 limiting/initiation step and/or final step in the production of that amino acid, and organized  
196 them based on the use of costly and complex precursors or cofactors (Figure 2B). Strikingly,  
197 we observed that the methionine induced genes (which are few in number) in these pathways  
198 regulated only the most critical, rate-limiting or costly steps in amino acid biosynthesis (p-  
199 value of  $3.8e^{-09}$ , Fisher’s exact test), but had little or no significant role in regulating the  
200 multiple other genes in the pathway that encode enzymes for inexpensive steps (Figure 2B).  
201 Finally, we note that these methionine-induced genes in the “amino acid biosynthesis” bin do  
202 not just broadly represent all amino acid biosynthesis, but synthesize what are viewed as the

203 costliest amino acids to synthesize<sup>39</sup>, namely the aromatic amino acids, the branched-chain  
204 amino acids, and lysine, which is highly overrepresented in ribosomal and core translational  
205 machinery proteins<sup>26</sup>.

206 Similarly, nucleotide biosynthesis involves very elaborate, multi-step, multi-enzyme  
207 pathways. Using a similar logic to group pathways, we find that the methionine dependent,  
208 upregulated genes again encoded enzymes controlling very specific, limiting steps in  
209 nucleotide synthesis (Figure 2A). Furthermore, these regulated steps all utilize  
210 glutamate/glutamine and/or NADPH, as well as pentose sugars from the PPP, i.e. the PPP-  
211 GDH-PLP nodes (Figure 2A). Notably, *RNRI*, which encodes the key enzyme in converting  
212 ribonucleotides to deoxyribonucleotides (and hence the critical hub for DNA synthesis), is  
213 strongly upregulated upon methionine addition (Figure 2A), while most other steps (which  
214 are not rate limiting) are not regulated by methionine. Separately, as a control, we expanded  
215 this analysis and compared the methionine response to minimal medium supplemented with  
216 all other nonSAAs, and here the overall metabolic grouping or organization (for methionine  
217 induced genes) remained unchanged (Figure S2), with nonSAAs resembling MM. Finally, in  
218 MM+nonSAAs, the few highly induced genes (compared to RM) function in methionine (and  
219 sulfur-amino acid) related biosynthesis or salvage (Figure S4B, Supplementary file E1), and  
220 not additional reactions. This further substantiates our overall observations for the role of  
221 methionine as an “anabolic signal”.

222 Collectively, this comparative transcriptome based analysis, focusing on the  
223 methionine induced metabolic program and carried out using a biochemical first principles  
224 approach, suggests not just a general anabolic remodelling due to methionine, but a  
225 hierarchical metabolic organization induced by methionine (Figure 2C). In this putative  
226 hierarchical organization, methionine induces genes regulating the PPP, key transamination  
227 reactions, and the synthesis of glutamine/glutamate (the PPP-GDH-PLP node). These three

228 processes directly allow critical steps in synthesis of the costliest amino acids and  
229 nucleotides. The key, limiting steps in these subsequent synthesis reactions are themselves  
230 induced by methionine, collectively setting up a structured anabolic program (Figure 2C).  
231 These data thus uniquely position methionine as an anabolic cue.

232

233 **The core metabolic response induced by methionine is regulated by *GCN4*.**

234 How might methionine mediate this very specific transcriptional response to induce these  
235 metabolic nodes and genes? We reasoned that there must be a methionine dependent  
236 activation of a transcriptional regulator(s), which can specifically induce these metabolic  
237 genes, including amino acid and nucleotide biosynthetic genes. Further, the methionine effect  
238 was strongest in conditions of overall amino acid limitation. While there is currently no  
239 known methionine dependent transcriptional regulator that can control these metabolic nodes,  
240 there is in fact a well-known master-regulator of amino acid biosynthesis. The conserved  
241 transcription factor Gcn4p (Atf4 in mammals) is a transcriptional activator, primarily  
242 controlling the amino acid biosynthetic genes during amino acid starvations<sup>40</sup>. Although the  
243 activity of Gcn4p has been mainly studied during starvation as a “stress response” regulator,  
244 and not in contexts involving increased proliferation, we wondered if a possible connection  
245 between methionine and Gcn4p might exist. We therefore first monitored the amounts of  
246 endogenous Gcn4p (chromosomally tagged with a C-terminal HA epitope) after a shift to  
247 MM, with and without supplementation of different amino acids including methionine.  
248 Surprisingly, Gcn4p amounts increased substantially specifically upon methionine  
249 supplementation alone (when other amino acids were not supplemented), compared to either  
250 MM, or MM supplemented with all 18 other nonSAAs (Figure 3A). This observation was  
251 independently confirmed using immunofluorescence based experiments (Figure S5A). We

252 therefore asked whether Gcn4p was necessary for the increased growth upon methionine  
253 supplementation. Notably, the *gcn4Δ* cells did not show any increased growth in methionine  
254 supplemented medium, but instead grew comparably to WT cells in MM (Figure 3B). As  
255 controls, in all other conditions (lacking methionine, or in RM) the growth of *gcn4Δ* cells was  
256 indistinguishable from the WT cells (Figure S5B). Collectively, these data suggest that  
257 Gcn4p is necessary for the methionine-mediated growth in otherwise amino acid poor  
258 conditions. We therefore hypothesized that the methionine dependent transcriptional  
259 response, particularly those related to metabolism, might be mediated by Gcn4p. To address  
260 the role for Gcn4p in this anabolic response, we next carried out a comparison of  
261 transcriptomes of *gcn4Δ* cells grown in RM, MM, MM+Met and MM+nonSAAs with wild-  
262 type cells grown in the respective conditions.

263 We first examined global trends of gene expression (similar to those in Figure 1B) in  
264 the absence of Gcn4p, and compared those to the WT set. Here, the baseline again was gene  
265 expression in WT cells in MM. To our surprise, the overall global gene expression trends in  
266 the Met set (in *gcn4Δ* cells) even more strongly resembled the RM set than WT cells (in  
267 methionine, from Figure 1B) (Figure 3C). The transcriptional response in all the other  
268 conditions (RM or nonSAA) was almost unaffected in *gcn4Δ* cells compared to WT cells  
269 (Figure 3C). This paradoxically suggested that in the absence of *GCN4*, methionine invokes  
270 an even stronger transcriptional response, with global trends seemingly resembling a strong  
271 “growth state” (Figure 3C). We also more closely compared transcriptomes of WT cells with  
272 *gcn4Δ* cells, under the same combination of conditions used earlier, and analyzed our data  
273 with the stringent filters used in the previous section. The overall changes in transcriptomes  
274 of WT vs *gcn4Δ* cells are shown (Figure 3D, Figure S6, Supplementary file E1). In all  
275 conditions except methionine, WT and *gcn4Δ* cells showed very similar gene expression  
276 profiles (Figure 3D), suggesting a unique role for Gcn4p in the presence of methionine. To

277 better understand what component of the methionine response was directly induced in a  
278 Gcn4p dependent manner, we organized the genes induced in methionine (in the *gcn4Δ* cells,  
279 compared to WT cells in MM) by function. When grouped using GO, we found that a very  
280 large number of genes (~200) induced in the presence of methionine, grouped into the  
281 general groups of “ribosome/translation”, and “nucleotide synthesis” (Figure 3E,  
282 Supplementary file E2). Surprisingly, this representation was even more striking than that  
283 seen in WT cells (Figure 1D), suggesting a strong “growth signature” in the presence of  
284 methionine even in cells lacking Gcn4p.

285 All these data suggested the perplexing observation that cells lacking Gcn4p showed a  
286 very strong transcriptional response in MM+Met, and that the signature of this transcriptional  
287 response largely remained similar to, but stronger than WT cells in MM+Met. Note however  
288 that (as shown earlier in Figure 3B) Gcn4p was essential for the growth induction due to  
289 methionine. These data therefore paradoxically suggested that while the overall “growth  
290 signature” response due to methionine remained, and was being further amplified in the  
291 absence of Gcn4p, only a small subset of Gcn4p regulated genes may be pivotal for the  
292 growth outcome. Do recall that the increased growth in methionine was entirely Gcn4p  
293 dependent. We therefore more carefully analyzed the classes of transcripts induced in WT  
294 and *gcn4Δ* cells by methionine (MM+Met set), and separated our functional groupings (based  
295 on GO) into two broad bins. One bin represented all genes related to ribosome function and  
296 translation (as seen in Figure 1D), while the other bin separated out the core metabolic genes  
297 similar to those classified in Figures 1 and 2 (Figure 3E). Strikingly, transcripts of every gene  
298 that mapped to ribosome/translation function (from Figure 1D) was higher in *gcn4Δ* cells  
299 compared to WT cells in the presence of methionine (Figure 3E). Contrastingly, transcript  
300 amounts of every gene related to amino acid biosynthesis, the PPP and nucleotide metabolism  
301 (and related metabolism) was significantly lower in the *gcn4Δ* cells than in WT cells (Figure

302 3E). Thus, this reorganization revealed that in the presence of methionine, while the induction  
303 of the translation machinery genes (which is the “growth signature”) was not Gcn4p  
304 dependent, the entire methionine induced core anabolic program hinged upon Gcn4p.

305

306 **Methionine induced enzymes in amino acid and nucleotide biosynthesis are Gcn4p**  
307 **dependent.**

308 We therefore more systematically examined the methionine and Gcn4p dependent  
309 transcription of genes that functionally regulated the PPP-GDH-PLP node, or specific steps in  
310 amino acid biosynthesis, which constitute the metabolic hierarchy we have described (Figure  
311 4A). Strikingly, the genes from the PPP, and transamination reactions were strongly  
312 downregulated in *gcn4Δ* cells compared to WT cells in methionine (Figure 4A). However,  
313 the transcript of the Gdh1 enzyme (required for glutamate synthesis) was only methionine,  
314 but not Gcn4p dependent (Figure 4A). Next, the transcripts of methionine induced genes  
315 encoding the key, rate-limiting steps in multiple branched-chain or aromatic amino acid, and  
316 lysine and arginine biosynthesis were also Gcn4p dependent. Finally, while most nucleotide  
317 biosynthesis genes were not Gcn4p dependent, the entire methionine induced RNR complex  
318 (which is critical for the NTP to dNTP conversion, required for DNA synthesis) was strongly  
319 Gcn4p dependent (Figure 4A). Collectively, these data suggest that the core anabolic program  
320 induced by methionine is Gcn4p dependent.

321 We next directly assayed the extent of (i) methionine controlling this anabolic rewiring,  
322 through the PPP-GDH-PLP node feeding subsequent anabolic reactions; and (ii), the extent  
323 of Gcn4p dependence for these steps. We first tested this at the biochemical level, comparing  
324 the enzyme amounts of three targets that represent the coupling of the PPP with other  
325 processes (the PPP-PLP-GDH node). These are Snz1p, Gnd2p and Gdh1p. Snz1p is required

326 for pyridoxal phosphate (PLP) biosynthesis<sup>41</sup>, which is essential for all transamination  
327 reactions<sup>1</sup>. As illustrated earlier in Figure 1E, PLP biosynthesis itself also requires the PPP  
328 intermediate erythrose-4-phosphate as a substrate. Gnd2p is the key NADPH generating  
329 enzyme in the oxidative branch of the PPP. Gdh1p consumes NADPH and makes glutamate  
330 from 2-ketoglutarate. We measured amounts of these three proteins from WT and *gcn4Δ* cells  
331 growing in MM, and MM+methionine (Figure 4B). Notably, Snz1p and Gnd2p showed a  
332 strong induction that was both methionine dependent, and dependent on Gcn4p (Figure 4B,  
333 Figure S7). Gdh1p was strongly dependent upon methionine, but was not dependent on  
334 Gcn4p (Figure 4B). We also measured *in vitro* Gdh1p activity (NADPH-GDH activity) in  
335 lysates from cells growing in MM or with methionine, and found that overall Gdh1p activity  
336 was higher in cells growing with methionine (Figure 4C). As seen in the Western blot  
337 analysis (Figure 4B), the *in vitro* Gdh1p activity was not dependent on Gcn4p (not shown).  
338 All these data strongly support the observation that methionine drives these key, coupled  
339 steps in biosynthesis, and that they are largely mediated by Gcn4p. Finally, an expected the  
340 final readout of this biochemical coupling should be changes in steady-state nucleotide  
341 amounts, with a Gcn4p dependence in methionine replete conditions. Comparing relative  
342 amounts of nucleotides in wild-type and *gcn4Δ* cells, we noted a decrease in the nucleotide  
343 amounts in *gcn4Δ* cells in the presence of methionine (Figure 4D). Collectively, these direct  
344 biochemical read-outs support our proposed paradigm of a coupled induction of the PPP, and  
345 key transamination reactions by methionine, leading to increased amino acid and nucleotide  
346 synthesis.

347

348 **Methionine increases amino acid biosynthesis *in vivo*.**

349           Substantiating these findings using steady-state metabolite measurements alone is  
350 insufficient (and often misleading), since any steady-state metabolite measurement (as in  
351 Figure 4D) cannot directly distinguish synthesis from consumption. Therefore, to directly  
352 address this possible hierarchical anabolic program, we resorted to a stable-isotope pulse  
353 labelling and an LC-MS/MS based approach to directly measure the new synthesis of amino  
354 acids. To WT or *gcn4Δ* cells in the respective medium with or without methionine, we pulsed  
355 <sup>15</sup>N-labelled ammonium sulfate, and measured the <sup>15</sup>N incorporation into amino acids (Figure  
356 5A, Table S2), before an effective steady-state of labelled amino acid synthesis and  
357 consumption was reached. This permits the detection of newly synthesized amino acids,  
358 which will incorporate the <sup>15</sup>N label. We observed that biosynthesis of all the aromatic amino  
359 acids, lysine, histidine, proline, arginine and asparagine is strongly dependent on methionine  
360 presence (Figure 5B). For technical reasons we could not measure label-incorporation into  
361 branched-chain amino acids. Notably, the label immediately (~20 min) percolated in  
362 asparagine and aromatic amino acid biosynthesis, and showed a very strong methionine  
363 dependence (Figure 5B). Asparagine, proline and phenylalanine biosynthesis were  
364 methionine dependent even in *gcn4Δ* cells, pointing towards possible *GCN4*-independent  
365 influences of methionine. For all the other amino acids measured, the biosynthesis was both  
366 methionine as well as *GCN4*-dependent (Figure 5B). These data directly indicate that  
367 methionine availability controls the key nodes around PPP-PLP-GDH axis, thereby  
368 generating the amino acid pool required for proliferation, and that this is largely regulated by  
369 Gcn4p.

370

### 371 **Methionine increases nucleotide biosynthesis *in vivo*.**

372           Given that the PPP and amino acid biosynthesis are directly regulated by methionine  
373 and Gcn4p, and the PPP metabolites and amino acids together couple to nucleotide synthesis,



374 we predicted that collectively, perturbing this node should have a severe consequence on  
375 nucleotide biosynthesis. In principle, this also will reflect flux through the coupled steps of  
376 the PPP, glutamate/glutamine synthesis, and the use of intermediates from amino acid  
377 biosynthetic pathways for carbon and nitrogen assimilation into nucleotides (Figure 6A). The  
378 carbon skeleton of nucleotides comes from the PPP, the nitrogen base is directly derived from  
379 glutamine/glutamate and aspartate, and glutamate synthesis is itself coupled to NADPH (from  
380 the PPP) (Figure 6A). Nucleotide biosynthesis is also coupled to histidine and tryptophan  
381 synthesis. We therefore adopted a direct estimation of methionine and Gcn4p dependent  
382 increases in nucleotide synthesis (similar to the approach in Figure 5), predicting an increase  
383 in *de novo* nucleotide synthesis due to methionine, coming from the earlier amino acid  
384 precursors. To this end, using a stable-isotope based nitrogen or carbon pulse labelling  
385 approach, coupled to targeted LC-MS/MS based measurement of nucleotides, we separately  
386 measured the incorporation of the nitrogen and carbon label into nucleotides, as illustrated in  
387 Figure 6B and 6C. We observed a strong increase in <sup>15</sup>N-labelled nucleotides upon the  
388 addition of methionine, in ~1 hour (Figure 6B, Table S2). Furthermore, this methionine-  
389 mediated incorporation of <sup>15</sup>N-label in nucleotides was entirely Gcn4p dependent (Figure 6B  
390 and Figure S8).

391 Monitoring carbon flux is extremely challenging in a non-fermentable carbon source  
392 like lactate (as compared to glucose), given the difficulties of following the labelled carbon  
393 molecules. Despite that, like the <sup>15</sup>N-labeling experiments described above, a similar  
394 experimental design was adopted to measure the <sup>13</sup>C-label incorporation into AMP (Figure  
395 6C, Table S2). We observed a significant increase in <sup>13</sup>C-labelled AMP upon the addition of  
396 methionine, and this methionine dependent incorporation of <sup>13</sup>C-label in AMP was not  
397 observed in cells lacking Gcn4p (Figure 6C). Collectively, these data show a methionine and  
398 Gcn4p dependent increase in *de novo* synthesis of nucleotides, coupling carbon and nitrogen

399 flux that is dependent on the PPP, and glutamate synthesis. Note that the overall kinetics of  
400 incorporation of label are entirely in line with the predicted hierarchy. Increased amino acid  
401 labels (shown in Figure 5) were seen in ~20 min post labelled ammonium sulfate addition,  
402 while the nucleotide label increase occurs in ~1 h, subsequent to the observed amino acid  
403 label increase. Thus, we directly demonstrate first the synthesis of new amino acids, and the  
404 subsequent synthesis of nucleotides, in a methionine and Gcn4p dependent manner.

405

## 406 **Discussion**

407           In this study, we show how methionine drives cellular proliferation by rewiring cells  
408 to an anabolic state, even under otherwise amino acid limited, challenging conditions. We  
409 uncover a regulated, hierarchical activation of metabolic processes by methionine, which  
410 leads to overall anabolism. We also present a mechanism of how methionine mediates this  
411 anabolic program.

412           Starting with a global transcriptome analysis (Figure 1), we systematically build the  
413 underlying metabolic foundations of a methionine mediated anabolic state switch.  
414 Methionine mediates a global transcriptional remodelling in cells, thereby controlling the  
415 anabolic program (Figures 1 and 2). For understanding the core metabolic logic within the  
416 transcriptional response to methionine we adopted a biochemical first principles based  
417 approach, emphasizing control points at rate or resource limiting biochemical steps, instead  
418 of solely relying on standard GO based organization. The organizational metabolic logic that  
419 emerged was striking (Figure 1 and 2). First, methionine positively regulates the PPP (Figure  
420 1). The PPP provides the pentose sugar backbones for nucleotides, along with reducing  
421 equivalents (NADPH), allowing reductive biosynthesis for a variety of anabolic molecules<sup>1</sup>.  
422 For amino acid and nucleotide synthesis, pyridoxal phosphate, which controls all  
423 transamination reactions, is also essential<sup>42</sup>, and methionine directly induced this node as well  
424 (Figure 1). Collectively, methionine strongly induced the PPP-GDH-PLP node (Figure 1).  
425 These three nodes can feed all the subsequent metabolic steps induced by methionine.  
426 Furthermore, in these subsequent anabolic nodes (the synthesis of amino acids and  
427 nucleotides), methionine only induces the expression of genes that control rate limiting or  
428 final steps (Figure 2). These biosynthetic nodes include those that synthesize what are  
429 considered the “costliest” amino acids, namely the aromatic amino acids and the branch chain  
430 amino acids (Figure 2). Notably, essentially every one of these (methionine regulated) steps

431 use cofactors or intermediates from the PPP-GDH-PLP node (Figure 1 and 2). Thus, it  
432 appears that methionine sets up this striking metabolic hierarchy, as illustrated in a schematic  
433 in Figure 2C and 6D.

434 Interestingly, the methionine dependent growth and increased activity in most of these  
435 metabolic nodes, and thus the overall anabolic program, depends upon Gcn4p (Figure 3 and  
436 4). Gcn4p is best understood as a regulator of amino acid biosynthesis during starvation<sup>43</sup>.  
437 Indeed, many of the *GCN4* targets picked up in our study compare well with the landmark  
438 study of *GCN4* targets<sup>43</sup> (see Figure S9 and Table S3). However, this role of Gcn4p in the  
439 presence of methionine in synchronously controlling these key hubs of the PPP,  
440 transamination reaction, glutamate biosynthesis, coupled with rate-regulating steps in costly  
441 amino acid and nucleotide biosynthesis has not been previously appreciated, and we think  
442 this is central to the anabolic program resulting in increased cell proliferation. This is in  
443 contrast to the well-studied role for Gcn4p for survival during starvation, allowing a  
444 restoration of amino acid levels. Also interestingly, Gcn4p appears to regulate only the core  
445 metabolic program induced by methionine, and not the induction of the translation machinery  
446 (as seen in Figure 3). This induction of translation due to methionine might be through other  
447 mechanisms, including activation of the TOR pathway<sup>25,44</sup>, and there seems to be a separation  
448 of the methionine sensing machinery from the actual effector of the anabolic program  
449 (Gcn4p). Finally, a combination of rigorous biochemical, and metabolic flux based analysis  
450 using stable-isotopes directly demonstrate this hierarchical coupling of the PPP, NADPH  
451 utilization and transamination reactions (in both nitrogen assimilation and carbon  
452 assimilation) first towards the increased synthesis of aromatic and branch-chain amino acids,  
453 and next towards nucleotides, in a methionine and Gcn4p dependent manner (Figures 5 and  
454 6). Collectively, our data permits the construction of an overall pyrimidical hierarchy of  
455 metabolic events, mediated by methionine, to set up an anabolic program (model in Figure

456 2C). This suggests more general organizational principles by which cells can specifically  
457 rewire metabolism.

458         The central role of the PPP in anabolism is now text-book knowledge<sup>1</sup>. Yet, a better  
459 appreciation of the importance of the PPP in mediating an anabolic rewiring is now emerging  
460 due to the association of the PPP to cancer metabolism<sup>45,46</sup>. Many anabolic transformations  
461 require contributions from the PPP, however, the metabolic cues regulating the PPP (and  
462 coupling to other processes) are not often obvious. Additionally, these studies ignore or  
463 underplay coincident but necessary metabolic events for proliferation. Our study directly  
464 addresses how methionine (likely through its downstream metabolite SAM), acts as an  
465 anabolic signal for cells, through setting up of the metabolic hierarchy explained earlier, with  
466 the co-incident PLP and glutamine nodes being critically important. This striking role of  
467 methionine regulating an anabolic program seems analogous to another central metabolite,  
468 acetyl-CoA, which is better known to determine cellular decisions towards growth<sup>15,47-50</sup>.  
469 Interesting correlations can be made from our observations to known roles of methionine in  
470 cancer cell metabolism, and metazoan growth. The earliest observations of methionine as  
471 important for proliferation in some cancers dates back to the 1950s<sup>33-35</sup>, and several types of  
472 cancer cells are addicted to methionine<sup>33,51-58</sup>. Other, distinct studies show that *Drosophila*  
473 fed on methionine rich diets exhibit rapid growth, high fecundity, and shorter lifespans<sup>30-32</sup>,  
474 all hallmarks of what a “proliferative” metabolite will do. Studies from yeast show how  
475 methionine inhibits autophagy, or regulates the TORC1 to boost growth<sup>25,26,38</sup>. One of the  
476 earliest known cell cycle entry check-points found in yeast links to methionine<sup>59</sup>. Upon  
477 sulfate (and thereby methionine) starvation, yeast cells arrest their growth to promote  
478 survivability<sup>20</sup>, and transform their proteome to preferentially express proteins containing  
479 fewer cysteine/methionine residues to save sulfur<sup>60</sup>. There are other, less appreciated  
480 observations connecting methionine metabolism and the PPP. Yeast cells lacking *ZWF1*

481 (encoding glucose-6-phosphate dehydrogenase, the first enzyme in the PPP) exhibit  
482 methionine auxotrophy<sup>61</sup>, and methionine supplementation also increases the oxidative stress  
483 tolerance of *zwf1Δ*<sup>62</sup>. Despite these studies highlighting a critical role of methionine, such a  
484 hierarchical logic explaining the organizational principles of the anabolic program mediated  
485 by methionine, and the mechanisms by which this is mediated, has thus far been elusive. Our  
486 study provides this.

487         Our use of a “less-preferred” carbon source, lactate, has helped reveal regulatory  
488 phenomena otherwise hidden in glucose and amino acid rich laboratory conditions, where a  
489 surfeit of costly metabolic resources (for example, unlimited PPP intermediates) are present.  
490 Tangentially, several recent reports emphasize the importance of lactate as a carbon source in  
491 rapidly proliferating cells<sup>63–65</sup>, and our observations might inform how proliferation is  
492 achieved in these conditions. Furthermore, the Gcn4p ortholog in mammals, Atf4, play  
493 important roles in cancer cell proliferation<sup>66–68</sup>, where many cancers continue to grow in  
494 apparently poor nutrient environments. Our study suggests how, in methionine rich (but  
495 otherwise amino acid limiting) conditions, Gcn4/Atf4 might function to promote growth, and  
496 not just help cells recover from nutrient stress. A separate, emerging question will be to  
497 understand how Gcn4p is itself regulated under these otherwise amino acid limited  
498 conditions, by methionine. Note that our studies would not have been possible without using  
499 prototrophic (“wild-type”) yeast strains to study responses to amino acids. Typically, studies  
500 utilize laboratory strains derived from an auxotrophic backgrounds (eg. S288C/BY4741),  
501 which require supplemented uracil, histidine, leucine and methionine for survival<sup>69–74</sup>, and  
502 where therefore overall amino acid homeostasis is severely altered. This precludes systematic  
503 experiments with amino acid limitation, such as those in this study.

504         We close by suggesting a possible metabolic cost based hypothesis for what might  
505 make methionine a strong growth cue. The *de novo* synthesis of methionine and its

506 immediate metabolites (notably SAM) is exceptionally costly in terms of NADPH molecules  
507 invested<sup>25,75-77</sup>. Cells require at least 6 molecules of NADPH to reduce sulfur and synthesize  
508 a single molecule of methionine. Since biology has tied multiple anabolic processes to  
509 reductive biosynthesis (dependent on NADPH from the PPP), the availability of methionine  
510 might be an ancient signal to represent a metabolic state where reductive equivalents are  
511 sufficiently available for all other reductive biosynthetic processes as a whole.

512

## 513 **Materials and Methods:**

### 514 **Yeast strains and growth media**

515 The prototrophic CEN.PK strain (referred to as wild-type or WT) was used in all experiments  
516 <sup>78</sup>. Strains with gene deletions or chromosomally tagged proteins (at the C-terminus) were  
517 generated as described. Strains used in this study are listed in Table S1.

518 The growth media used in this study are RM (1% yeast extract, 2% peptone and 2% lactate)  
519 and MM (0.17% yeast nitrogen base without amino acids, 0.5% ammonium sulfate and 2%  
520 lactate). All amino acids were supplemented at 2 mM. NonSAAs refers to the mixture of all  
521 standard amino acids (2 mM each) except methionine, cysteine and tyrosine.

522 The indicated strains were grown in RM with repeated dilutions (~36 hours), and the culture  
523 in the log phase (absorbance at 600 nm of ~1.2) was subsequently switched to MM, with or  
524 without addition of the indicated amino acids. For growth curves, the RM acclimatized  
525 cultures were used and diluted in a fresh medium with the starting absorbance of ~0.2 and the  
526 growth was monitored at the indicated time intervals.

### 527 **Western blot analysis**

528 Approximately ten OD<sub>600</sub> cells were collected from respective cultures, pelleted and flash-  
529 frozen in liquid nitrogen until further use. The cells were re-suspended in 400 µl of 10%  
530 trichloroacetic acid and lysed by bead-beating three times: 30 sec of beating and then 1 min  
531 of cooling on ice. The precipitates were collected by centrifugation, re-suspended in 400 µl of  
532 SDS-glycerol buffer (7.3% SDS, 29.1% glycerol and 83.3 mM Tris base) and heated at  
533 100°C for 10 min. The supernatant after centrifugation was treated as the crude extract.  
534 Protein concentrations from extracts were estimated using bicinchoninic acid assay (Thermo  
535 Scientific). Equal amounts of samples were resolved on 4 to 12% Bis-Tris gels (Invitrogen).



536 Coomassie blue–stained gels were used as loading controls. Western blots were developed  
537 using the antibodies against the respective tags. We used the following primary antibodies:  
538 monoclonal FLAG M2 (Sigma), and HA (12CA5, Roche). Horseradish peroxidase–  
539 conjugated secondary antibodies (mouse and rabbit) were obtained from Sigma. For Western  
540 blotting, standard enhanced chemiluminescence reagents (GE Healthcare) were used. ImageJ  
541 was used for quantification.

#### 542 **Immunofluorescence measurements**

543 Yeast cells were fixed with 3.7% formaldehyde, washed and resuspended in spheroplasting  
544 buffer (40 mM potassium phosphate buffer, pH 6.5; 0.5 mM MgCl<sub>2</sub>; 1.2 M sorbitol).  
545 Spheroplasts were prepared by zymolyase (MP Biomedicals, 08320921) treatment and spread  
546 on a slide pretreated with 50 µl of 1 mg/ml polylysine (Sigma-Aldrich, P6407). Gcn4-HA  
547 was stained with the mouse monoclonal anti-HA (12CA5) primary antibody (Roche,  
548 11583816001) and Alexa Fluor 488-conjugated Goat anti-Mouse IgG (H+L) secondary  
549 antibody (Thermofisher, A32723). DNA was stained with 1µg/ml DAPI for 2 minutes,  
550 washed and mounted in Fluoromount-G (Southern Biotech, 0100-01). The cells were imaged  
551 using Olympus FV1000 confocal microscope.

#### 552 **RNA-seq analysis:**

553 Total RNA from yeast cells was extracted using hot acid phenol method <sup>79</sup>. The quality of  
554 RNA was checked on Bioanalyzer using an RNA 6000 Nano kit (Agilent) and the libraries  
555 were prepared using TruSeq RNA library preparation kit V2 (Illumina). The samples were  
556 sequenced on Illumina platform HiSeq2500. The raw data is available with NCBI-SRA under  
557 the accession number SRP101768. Genome and the annotation files of *S. cerevisiae* S288C  
558 strain were downloaded from Saccharomyces Genome Database (SGD;  
559 <http://www.yeastgenome.org/>). 100-mer, single-end reads obtained from RNA sequencing

560 experiments were mapped to the S288C genome using Burrows Wheeler Aligner (BWA)<sup>80</sup>.  
561 Mapped reads with the mapping quality of  $\geq 20$  were used for the further analysis. The  
562 number of reads mapped to each gene was calculated and the read count matrix was  
563 generated. The read count matrix was fed into EdgeR, a Bioconductor package used for  
564 analyzing differential gene expression<sup>81</sup>. Genes which are differentially expressed by at least  
565 3-fold with the p-value of  $<0.0001$  were considered for further analysis. Normalized gene  
566 expression was calculated by dividing the number of reads by the gene length and the total  
567 number of reads for those samples, then dividing each of these values with the mode of its  
568 distribution<sup>82</sup>. Absolute expression levels of the genes between the replicates are well  
569 correlated with the Pearson correlation coefficient (R) values more than 0.99 (see Figure S2).  
570 Mapping of genes to the related pathways and gene ontology analysis were carried out using  
571 public databases such as Yeastcyc<sup>83</sup>, GeneCodis<sup>84-86</sup> and SGD<sup>87</sup>.

## 572 **Metabolite extractions and measurements by LC-MS/MS**

573 Cells were grown in RM for ~36 hours and transferred to MM with and without methionine  
574 for the indicated time. After incubation, cells were rapidly harvested and metabolite extracted  
575 as described earlier<sup>21</sup>. Metabolites were measured using LC-MS/MS method as described  
576 earlier<sup>38</sup>. Standards were used for developing multiple reaction monitoring (MRM) methods  
577 on Thermo Scientific TSQ Vantage triple stage quadrupole mass spectrometer or Sciex  
578 QTRAP 6500. For positive polarity mode, metabolites were separated using a Synergi 4 $\mu$   
579 Fusion-RP 80A column (150  $\times$  4.6 mm, Phenomenex) on Agilent's 1290 infinity series  
580 UHPLC system coupled to mass spectrometer. Buffers used for separation were: buffer A:  
581 99.9% H<sub>2</sub>O/0.1% formic acid and buffer B: 99.9% methanol/0.1% formic acid (Flow rate, 0.4  
582 ml/min; T = 0 min, 0% B; T = 3 min, 5% B; T = 10 min, 60% B; T = 10.1 min, 80% B; T =  
583 12 min, 80% B; T = 14 min, 5% B; T = 15 min, 0% B; T = 20 min, stop). For negative  
584 polarity mode, metabolites were separated using a Luna HILIC 200A column (150  $\times$  4.6 mm,

585 Phenomenex). Buffers used for separation were: buffer A: 5 mM ammonium formate in H<sub>2</sub>O  
586 and buffer B: 100% acetonitrile (flow rate: 0.4 ml/min; T = 0 min, 95% B; T = 1 min, 40% B;  
587 T = 7 min, 10% B; T = 11 min, 1% B; T = 13 min, 95% B; T = 17 min, stop). The area under  
588 each peak was calculated using Thermo Xcalibur software (Qual and Quan browsers).

### 589 **<sup>15</sup>N- and <sup>13</sup>C- based metabolite labelling experiments**

590 For detecting <sup>15</sup>N-label incorporation in amino acids and nucleotides, <sup>15</sup>N-ammonium sulfate  
591 with all nitrogens labelled (Sigma- Aldrich) was used. For <sup>13</sup>C-labeling experiment, <sup>13</sup>C-  
592 lactate with all carbons labelled (Cambridge Isotope Laboratories) was used. In the labelling  
593 experiments, 0.5X refers to 0.25% ammonium sulfate or 1% lactate. All the parent/product  
594 masses measured are enlisted in Table S2. Amino acid measurements were done in the  
595 positive polarity mode. For all the nucleotide measurements, release of the nitrogen base was  
596 monitored in positive polarity mode. For the <sup>13</sup>C-label experiment, the phosphate release was  
597 monitored in negative polarity mode. Under these conditions, the nitrogen base release cannot  
598 be monitored here as the nitrogen base itself has carbon skeleton, which will complicate the  
599 analysis. The HPLC and MS/MS protocol was similar to those explained above.

### 600 **GDH assays**

601 Glutamate dehydrogenase activity was measured as described in <sup>88</sup>, with some modifications.  
602 Yeast cells were lysed by bead-beating in lysis buffer (100 mM potassium phosphate buffer,  
603 pH 7; 5% glycerol; 1 mM PMSF; 0.1% Tween-20; 1 mM EDTA; 1 mM 2-mercaptoethanol).  
604 NADP-dependent activity was measured by monitoring oxidation of NADPH (assay buffer:  
605 100 mM Tris-HCl, pH 7.2; 10 mM 2-ketoglutarate, pH adjusted to 7.2; 100 mM ammonium  
606 chloride; 0.1 mM NADPH) at 340 nm. Protein concentrations from extracts were estimated  
607 using bicinchoninic acid assay (Thermo Scientific). One enzyme unit corresponds to the  
608 amount of enzyme required to oxidize one μmol of NADPH min<sup>-1</sup> at room temperature.

609 **Statistical analysis**

610 In most experiments, Student's t-test was applied for calculating the p-values. Wherever  
611 necessary, other tests were applied and indicated accordingly.

612

613

614 **Acknowledgements:**

615 We acknowledge Dhananjay Shinde, Padma Ramakrishnan and the NCBS/inStem/C-CAMP  
616 Mass spectrometry facility for LC-MS/MS support, Avadheesh Pandit and the  
617 NCBS/inStem/C-CAMP next-generation sequencing facility for assistance with library  
618 preparation. We thank Utpal Banerjee, Mark Sharpley, Marco Foiani, Christopher Bruhn,  
619 Krishnamurthy Natarajan, Arati Ramesh and PJ Bhat for critical comments on this  
620 manuscript. This work was supported by a Wellcome Trust-DBT IA intermediate fellowship  
621 (IA/I/14/2/501523) and inStem/DBT institutional support to SL. ASW, RG, RS acknowledge  
622 bridging fellowships (from inStem), and ASW, RG and RS are supported by DST SERB-  
623 national postdoctoral fellowships (PDF/2015/000225, PDF/2016/000416 and  
624 PDF/2016/001877 respectively).

625 **References:**

- 626 1. Nelson, DL; Cox, M. *Principles of biochemistry*. (W. H. Freeman, 2017).
- 627 2. Warner, J. R. The economics of ribosome biosynthesis in yeast. *Trends Biochem. Sci.*  
628 **24**, 437–40 (1999).
- 629 3. Warner, J. R., Vilardell, J. & Sohn, J. H. Economics of ribosome biosynthesis. *Cold*  
630 *Spring Harb. Symp. Quant. Biol.* **66**, 567–74 (2001).
- 631 4. Jorgensen, P. & Tyers, M. How Cells Coordinate Growth and Division. *Curr. Biol.* **14**,  
632 R1014–R1027 (2004).
- 633 5. Broach, J. R. Nutritional Control of Growth and Development in Yeast. *Genetics* **192**,  
634 73–105 (2012).
- 635 6. Ljungdahl, P. O. & Daignan-Fornier, B. Regulation of Amino Acid, Nucleotide, and  
636 Phosphate Metabolism in *Saccharomyces cerevisiae*. *Genetics* **190**, 885–929 (2012).
- 637 7. Dechant, R. & Peter, M. Nutrient signals driving cell growth. *Curr. Opin. Cell Biol.*  
638 **20**, 678–87 (2008).
- 639 8. Brauer, M. J. *et al.* Coordination of Growth Rate, Cell Cycle, Stress Response, and  
640 Metabolic Activity in Yeast. *Mol. Biol. Cell* **19**, 352–267 (2008).
- 641 9. Boer, V. M., Crutchfield, C. A., Bradley, P. H., Botstein, D. & Rabinowitz, J. D.  
642 Growth-limiting Intracellular Metabolites in Yeast Growing under Diverse Nutrient  
643 Limitations. *Mol. Biol. Cell* **21**, 198–211 (2010).
- 644 10. Warburg, O. On the origin of cancer cells. *Science* **123**, 309–14 (1956).
- 645 11. Heiden, M. G. Vander, Cantley, L. C. & Thompson, C. B. Understanding the Warburg  
646 Effect: The Metabolic Requirements of Cell Proliferation. *Science (80- )*. **324**, 1029–  
647 1033 (2009).
- 648 12. DeBerardinis, R. J., Sayed, N., Ditsworth, D. & Thompson, C. B. Brick by brick:  
649 metabolism and tumor cell growth. *Curr. Opin. Genet. Dev.* **18**, 54–61 (2008).

- 650 13. Tong, X., Zhao, F. & Thompson, C. B. The molecular determinants of de novo  
651 nucleotide biosynthesis in cancer cells. *Curr. Opin. Genet. Dev.* **19**, 32–7 (2009).
- 652 14. Gray, J. V. *et al.* ‘Sleeping beauty’: quiescence in *Saccharomyces cerevisiae*.  
653 *Microbiol. Mol. Biol. Rev.* **68**, 187–206 (2004).
- 654 15. Cai, L., Sutter, B. M., Li, B. & Tu, B. P. Acetyl-CoA induces cell growth and  
655 proliferation by promoting the acetylation of histones at growth genes. *Mol. Cell* **42**,  
656 426–37 (2011).
- 657 16. Slavov, N. & Botstein, D. Coupling among growth rate response, metabolic cycle, and  
658 cell division cycle in yeast. *Mol. Biol. Cell* **22**, 1997–2009 (2011).
- 659 17. Ye, C., Sutter, B. M., Wang, Y., Kuang, Z. & Tu, B. P. A Metabolic Function for  
660 Phospholipid and Histone Methylation. *Mol. Cell* **66**, 180–193.e8 (2017).
- 661 18. Xu, Y.-F. *et al.* Nucleotide degradation and ribose salvage in yeast. *Mol. Syst. Biol.* **9**,  
662 665 (2013).
- 663 19. Mulleder, M. *et al.* Functional Metabolomics Describes the Yeast Biosynthetic  
664 Regulome. *Cell* **167**, 553–565.e12 (2016).
- 665 20. Boer, V. M., Amini, S. & Botstein, D. Influence of genotype and nutrition on survival  
666 and metabolism of starving yeast. *Proc. Natl. Acad. Sci.* **105**, 6930–6935 (2008).
- 667 21. Tu, B. P. *et al.* Cyclic changes in metabolic state during the life of a yeast cell. *Proc.*  
668 *Natl. Acad. Sci. U. S. A.* **104**, 16886–16891 (2007).
- 669 22. Slavov, N. & Botstein, D. Decoupling nutrient signaling from growth rate causes  
670 aerobic glycolysis and deregulation of cell size and gene expression. *Mol. Biol. Cell*  
671 **24**, 157–168 (2013).
- 672 23. Klosinska, M. M., Crutchfield, C. A., Bradley, P. H., Rabinowitz, J. D. & Broach, J. R.  
673 Yeast cells can access distinct quiescent states. *Genes Dev.* **25**, 336–49 (2011).
- 674 24. Laxman, S. & Tu, B. P. Systems approaches for the study of metabolic cycles in yeast.

- 675 *Curr. Opin. Genet. Dev.* **20**, 599–604 (2010).
- 676 25. Sutter, B. M. B. M., Wu, X. X., Laxman, S. & Tu, B. P. B. P. Methionine inhibits  
677 autophagy and promotes growth by inducing the SAM-responsive methylation of  
678 PP2A. *Cell* **154**, 403–15 (2013).
- 679 26. Laxman, S. *et al.* Sulfur Amino Acids Regulate Translational Capacity and Metabolic  
680 Homeostasis through Modulation of tRNA Thiolation. *Cell* **154**, 416–429 (2013).
- 681 27. Tu, B. P., Kudlicki, A., Rowicka, M. & McKnight, S. L. Logic of the yeast metabolic  
682 cycle: temporal compartmentalization of cellular processes. *Science* **310**, 1152–1158  
683 (2005).
- 684 28. González, A. & Hall, M. N. Nutrient sensing and TOR signaling in yeast and  
685 mammals. *EMBO J.* **8**, e201696010 (2017).
- 686 29. Wolfson, R. L. & Sabatini, D. M. The Dawn of the Age of Amino Acid Sensors for the  
687 mTORC1 Pathway. *Cell Metab.* **26**, 301–309 (2017).
- 688 30. Troen, A. M. *et al.* Lifespan modification by glucose and methionine in *Drosophila*  
689 *melanogaster* fed a chemically defined diet. *Age (Dordr.)*. **29**, 29–39 (2007).
- 690 31. Lee, B. C., Kaya, A. & Gladyshev, V. N. Methionine restriction and life-span control.  
691 *Ann. N. Y. Acad. Sci.* **1363**, 116–124 (2016).
- 692 32. Lee, B. C. *et al.* Methionine restriction extends lifespan of *Drosophila melanogaster*  
693 under conditions of low amino-acid status. *Nat. Commun.* **5**, (2014).
- 694 33. Cavuoto, P. & Fenech, M. F. A review of methionine dependency and the role of  
695 methionine restriction in cancer growth control and life-span extension. *Cancer Treat.*  
696 *Rev.* **38**, 726–736 (2012).
- 697 34. Breillout, F., Antoine, E. & Poupon, M. F. Methionine dependency of malignant  
698 tumors: a possible approach for therapy. *J. Natl. Cancer Inst.* **82**, 1628–32 (1990).
- 699 35. Sugimura, T., Birnbaum, S. M., Winitz, M. & Greenstein, J. P. Quantitative nutritional

- 700 studies with water-soluble, chemically defined diets. VIII. The forced feeding of diets  
701 each lacking in one essential amino acid. *Arch. Biochem. Biophys.* **81**, 448–455 (1959).
- 702 36. Gu, X. *et al.* SAMTOR is an S -adenosylmethionine sensor for the mTORC1 pathway.  
703 *Science (80-. )*. **818**, 813–818 (2017).
- 704 37. Wu, X. & Tu, B. P. Selective regulation of autophagy by the Iml1-Npr2-Npr3 complex  
705 in the absence of nitrogen starvation. *Mol. Biol. Cell* **22**, 4124–4133 (2011).
- 706 38. Laxman, S., Sutter, B. M. B. M., Shi, L. & Tu, B. P. B. P. Npr2 inhibits TORC1 to  
707 prevent inappropriate utilization of glutamine for biosynthesis of nitrogen-containing  
708 metabolites. *Sci. Signal.* **7**, ra120 (2014).
- 709 39. Barton, M. D., Delneri, D., Oliver, S. G., Rattray, M. & Bergman, C. M. Evolutionary  
710 Systems Biology of Amino Acid Biosynthetic Cost in Yeast. *PLoS One* **5**, e11935  
711 (2010).
- 712 40. Hinnebusch, A. G. Translational regulation of GCN4 and the general amino acid  
713 control of yeast. *Annu. Rev. Microbiol.* **59**, 407–50 (2005).
- 714 41. Dong, Y.-X., Sueda, S., Nikawa, J.-I. & Kondo, H. Characterization of the products of  
715 the genes SNO1 and SNZ1 involved in pyridoxine synthesis in *Saccharomyces*  
716 *cerevisiae*. *Eur. J. Biochem.* **271**, 745–752 (2004).
- 717 42. Eliot, A. C. & Kirsch, J. F. Pyridoxal phosphate enzymes: mechanistic, structural, and  
718 evolutionary considerations. *Annu. Rev. Biochem.* **73**, 383–415 (2004).
- 719 43. Natarajan, K. *et al.* Transcriptional profiling shows that Gcn4p is a master regulator of  
720 gene expression during amino acid starvation in yeast. *Mol. Cell. Biol.* **21**, 4347–68  
721 (2001).
- 722 44. Laxman, S., Sutter, B. M. B. M. & Tu, B. P. B. P. Methionine is a signal of amino acid  
723 sufficiency that inhibits autophagy through the methylation of PP2A. *Autophagy* **10**,  
724 386–387 (2014).



- 725 45. Patra, K. C. & Hay, N. The pentose phosphate pathway and cancer. *Trends Biochem.*  
726 *Sci.* **39**, 347–354 (2014).
- 727 46. Cairns, R. A., Harris, I. S. & Mak, T. W. Regulation of cancer cell metabolism. *Nat.*  
728 *Rev. Cancer* **11**, 85–95 (2011).
- 729 47. Comerford, S. A. *et al.* Article Acetate Dependence of Tumors. *Cell* **159**, 1591–1602  
730 (2014).
- 731 48. Shi, L. & Tu, B. P. Acetyl-CoA induces transcription of the key G1 cyclin CLN3 to  
732 promote entry into the cell division cycle in *Saccharomyces cerevisiae*. *Proc. Natl.*  
733 *Acad. Sci.* **110**, 7318–7323 (2013).
- 734 49. Pedro, M. B. & Madeo, F. Review Acetyl Coenzyme A : A Central Metabolite and  
735 Second Messenger. *Cell Metab.* **21**, 805–821 (2015).
- 736 50. Mariño, G. *et al.* Regulation of autophagy by cytosolic acetyl-coenzyme A. *Mol. Cell*  
737 **53**, 710–25 (2014).
- 738 51. Halpern, B. C., Clark, B. R., Hardy, D. N., Halpern, R. M. & Smith, R. A. The effect  
739 of replacement of methionine by homocystine on survival of malignant and normal  
740 adult mammalian cells in culture. *Proc. Natl. Acad. Sci. U. S. A.* **71**, 1133–6 (1974).
- 741 52. Stern, P. H. & Hoffman, R. M. Enhanced in vitro selective toxicity of  
742 chemotherapeutic agents for human cancer cells based on a metabolic defect. *J. Natl.*  
743 *Cancer Inst.* **76**, 629–39 (1986).
- 744 53. Guo, H. Y., Herrera, H., Groce, A. & Hoffman, R. M. Expression of the biochemical  
745 defect of methionine dependence in fresh patient tumors in primary histoculture.  
746 *Cancer Res.* **53**, 2479–83 (1993).
- 747 54. Lu, S. & Epner, D. E. Molecular mechanisms of cell cycle block by methionine  
748 restriction in human prostate cancer cells. *Nutr. Cancer* **38**, 123–30 (2000).
- 749 55. Poirson-Bichat, F., Gonçalves, R. A., Miccoli, L., Dutrillaux, B. & Poupon, M. F.

- 750 Methionine depletion enhances the antitumoral efficacy of cytotoxic agents in drug-  
751 resistant human tumor xenografts. *Clin. Cancer Res.* **6**, 643–53 (2000).
- 752 56. Kokkinakis, D. M. *et al.* Synergy between methionine stress and chemotherapy in the  
753 treatment of brain tumor xenografts in athymic mice. *Cancer Res.* **61**, 4017–23 (2001).
- 754 57. Cellarier, E. *et al.* Methionine dependency and cancer treatment. *Cancer Treat. Rev.*  
755 **29**, 489–99 (2003).
- 756 58. Clarke, C. J. *et al.* The Initiator Methionine tRNA Drives Secretion of Type II  
757 Collagen from Stromal Fibroblasts to Promote Tumor Growth and Angiogenesis.  
758 *Curr. Biol.* **26**, 755–65 (2016).
- 759 59. Unger, M. W. & Hartwell, L. H. Control of cell division in *Saccharomyces cerevisiae*  
760 by methionyl-tRNA. *Proc. Natl. Acad. Sci. U. S. A.* **73**, 1664–8 (1976).
- 761 60. Lagniel, G. *et al.* Sulfur Sparing in the Yeast Proteome in Response to Sulfur Demand  
762 Mire. *Mol. Cell* **9**, 713–723 (2002).
- 763 61. Thomas, D., Cherest, H. & Surdin-Kerjan, Y. Identification of the structural gene for  
764 glucose-6-phosphate dehydrogenase in yeast. Inactivation leads to a nutritional  
765 requirement for organic sulfur. *EMBO J.* **10**, 547–53 (1991).
- 766 62. Campbell, K., Vowinckel, J., Keller, M. A. & Ralser, M. Methionine Metabolism  
767 Alters Oxidative Stress Resistance via the Pentose Phosphate Pathway. *Antioxid.*  
768 *Redox Signal.* **24**, 543–547 (2016).
- 769 63. Kennedy, K. M. *et al.* Catabolism of exogenous lactate reveals it as a legitimate  
770 metabolic substrate in breast cancer. *PLoS One* **8**, e75154 (2013).
- 771 64. Faubert, B. *et al.* Lactate Metabolism in Human Lung Tumors. *Cell* **171**, 358–371.e9  
772 (2017).
- 773 65. Hu, X., Chao, M. & Wu, H. Central role of lactate and proton in cancer cell resistance  
774 to glucose deprivation and its clinical translation. *Signal Transduct. Target. Ther.* **2**,

- 775 16047 (2017).
- 776 66. Bi, M. *et al.* ER stress-regulated translation increases tolerance to extreme hypoxia and  
777 promotes tumor growth. *EMBO J.* **24**, 3470–81 (2005).
- 778 67. Palam, L. R., Gore, J., Craven, K. E., Wilson, J. L. & Korc, M. Integrated stress  
779 response is critical for gemcitabine resistance in pancreatic ductal adenocarcinoma.  
780 *Cell Death Dis.* **6**, e1913 (2015).
- 781 68. Ye, J. *et al.* The GCN2-ATF4 pathway is critical for tumour cell survival and  
782 proliferation in response to nutrient deprivation. *EMBO J.* **29**, 2082–96 (2010).
- 783 69. Sherman, F. Getting started with yeast. *Methods Enzymol.* **194**, 3–21 (1991).
- 784 70. Pronk, J. T. Auxotrophic yeast strains in fundamental and applied research. *Appl.*  
785 *Environ. Microbiol.* **68**, 2095–100 (2002).
- 786 71. Corbacho, I., Teixidó, F., Velázquez, R., Hernández, L. M. & Olivero, I. Standard  
787 YPD, even supplemented with extra nutrients, does not always compensate growth  
788 defects of *Saccharomyces cerevisiae* auxotrophic strains. *Antonie Van Leeuwenhoek*  
789 **99**, 591–600 (2011).
- 790 72. Brachmann, C. B. *et al.* Designer deletion strains derived from *Saccharomyces*  
791 *cerevisiae* S288C: a useful set of strains and plasmids for PCR-mediated gene  
792 disruption and other applications. *Yeast* **14**, 115–32 (1998).
- 793 73. Gerashchenko, M. V. & Gladyshev, V. N. Translation inhibitors cause abnormalities in  
794 ribosome profiling experiments. *Nucleic Acids Res.* **42**, e134–e134 (2014).
- 795 74. Alam, M. T. *et al.* The metabolic background is a global player in *Saccharomyces* gene  
796 expression epistasis. *Nat. Microbiol.* **1**, 15030 (2016).
- 797 75. Thomas, D., Surdin-kerjan, Y. & Ge, C. De. Metabolism of Sulfur Amino Acids in  
798 *Saccharomyces cerevisiae*. *Microbiol. Mol. Biol. Rev.* **61**, 503–532 (1997).
- 799 76. Kaleta, C. & Schäuble, S. Metabolic costs of amino acid and protein production in

- 800 Escherichia coli. *Biotechnol. J.* **8**, 1105–1114 (2013).
- 801 77. Mampel, J., Schröder, H., Haefner, S. & Sauer, U. Single-gene knockout of a novel  
802 regulatory element confers ethionine resistance and elevates methionine production in  
803 *Corynebacterium glutamicum*. *Appl. Microbiol. Biotechnol.* **68**, 228–36 (2005).
- 804 78. van Dijken JP *et al.* An interlaboratory comparison of physiological and genetic  
805 properties of four *Saccharomyces cerevisiae* strains. *Enzyme Microb. Technol.* **26**,  
806 706–714 (2000).
- 807 79. Collart, M. A. & Oliviero, S. in *Current Protocols in Molecular Biology* (John Wiley  
808 & Sons, Inc., 2001). doi:10.1002/0471142727.mb1312s23
- 809 80. Li, H. & Durbin, R. Fast and accurate short read alignment with Burrows-Wheeler  
810 transform. *Bioinformatics* **25**, 1754–1760 (2009).
- 811 81. Robinson, M. D., McCarthy, D. J. & Smyth, G. K. edgeR: a Bioconductor package for  
812 differential expression analysis of digital gene expression data. *Bioinformatics* **26**,  
813 139–40 (2010).
- 814 82. Srinivasan, R. *et al.* Genomic analysis reveals epistatic silencing of ‘expensive’ genes  
815 in *Escherichia coli* K-12. *Mol. Biosyst.* **9**, 2021–33 (2013).
- 816 83. Caspi, R. *et al.* The MetaCyc database of metabolic pathways and enzymes and the  
817 BioCyc collection of Pathway/Genome Databases. *Nucleic Acids Res.* **42**, D459-71  
818 (2014).
- 819 84. Tabas-Madrid, D., Nogales-Cadenas, R. & Pascual-Montano, A. GeneCodis3: a non-  
820 redundant and modular enrichment analysis tool for functional genomics. *Nucleic*  
821 *Acids Res.* **40**, W478–W483 (2012).
- 822 85. Nogales-Cadenas, R. *et al.* GeneCodis: interpreting gene lists through enrichment  
823 analysis and integration of diverse biological information. *Nucleic Acids Res.* **37**,  
824 W317–W322 (2009).

- 825 86. Carmona-Saez, P., Chagoyen, M., Tirado, F., Carazo, J. M. & Pascual-Montano, A.  
826 GENECODIS: a web-based tool for finding significant concurrent annotations in gene  
827 lists. *Genome Biol.* **8**, R3 (2007).
- 828 87. Dwight, S. S. *et al.* Saccharomyces Genome Database (SGD) provides secondary gene  
829 annotation using the Gene Ontology (GO). *Nucleic Acids Res.* **30**, 69–72 (2002).
- 830 88. Doherty, D. in 850–856 (1970). doi:10.1016/0076-6879(71)17294-1
- 831 89. Vattam, K. M. & Wek, R. C. Reinitiation involving upstream ORFs regulates ATF4  
832 mRNA translation in mammalian cells. *Proc. Natl. Acad. Sci. U. S. A.* **101**, 11269–74  
833 (2004).
- 834

## Figure legends:

Figure 1

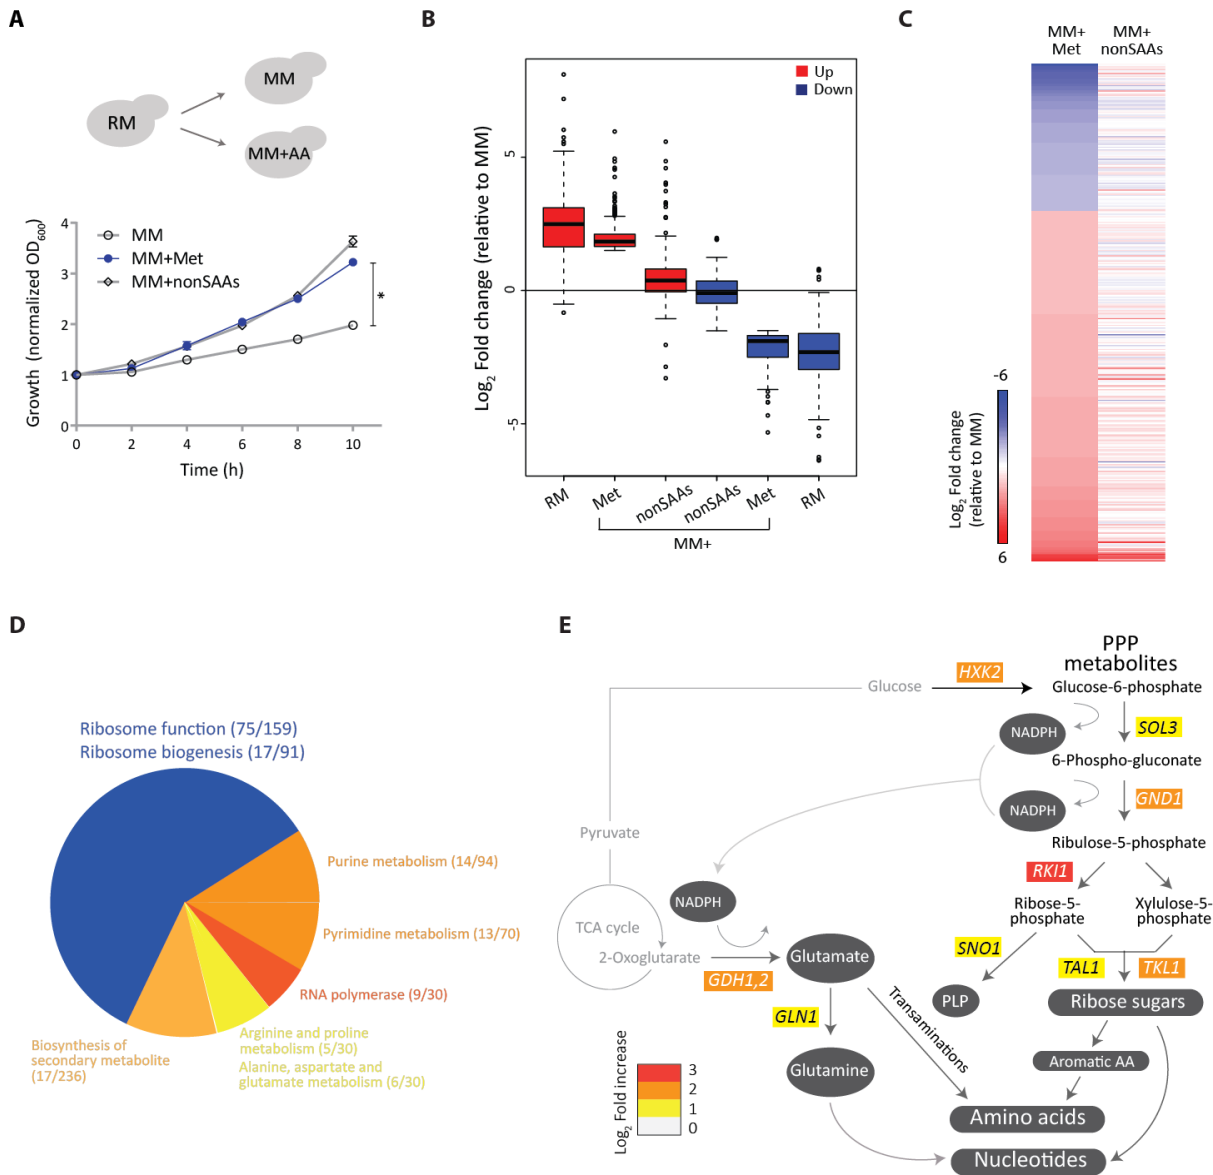

**Figure 1: Methionine mediates a transcriptional remodelling program inducing key anabolic nodes.**

A) Methionine and cell proliferation during amino acid limitation. Shown are growth profiles of WT cells grown in rich medium (RM) and shifted to minimal medium (MM) with or without the indicated amino acid supplements (2 mM each; nonSAAs indicates all the non-sulfur amino acids except tyrosine). The growth profile with methionine is in blue.

B) Global trends of gene expression in RM and methionine supplemented MM. The boxplot shows gene expression levels of transcripts in WT cells grown in MM plus methionine in comparison to the MM set, and compares the expression levels of these genes in the RM or MM plus nonSAAs sets.

C) Effect of methionine on a transcriptional program in cells. The heat map shows differences in differentially expressed genes in cells grown in MM plus methionine compared to MM (left column), with cells grown in MM plus nonSAAs compared to MM (right column).

D) Gene Ontology (GO) based analysis of the methionine-induced genes. The pie-chart depicts the processes grouped by GO analysis for the up-regulated transcripts between MM plus methionine and MM set. Numbers in the bracket indicate the number of genes from the query set/ total number of genes in the reference set for the given GO category.

E) Manual regrouping of the methionine responsive genes into their relevant metabolic pathways, pertinent only to carbon metabolism and central metabolic processes. The pathway map includes individual genes in central carbon metabolism which are induced by methionine (indicating the fold-changes in gene expression). The arrows marked red indicate increased expression across the pathway.

In all panels, data shows mean±SD. \*  $p < 0.05$ .

Figure 2

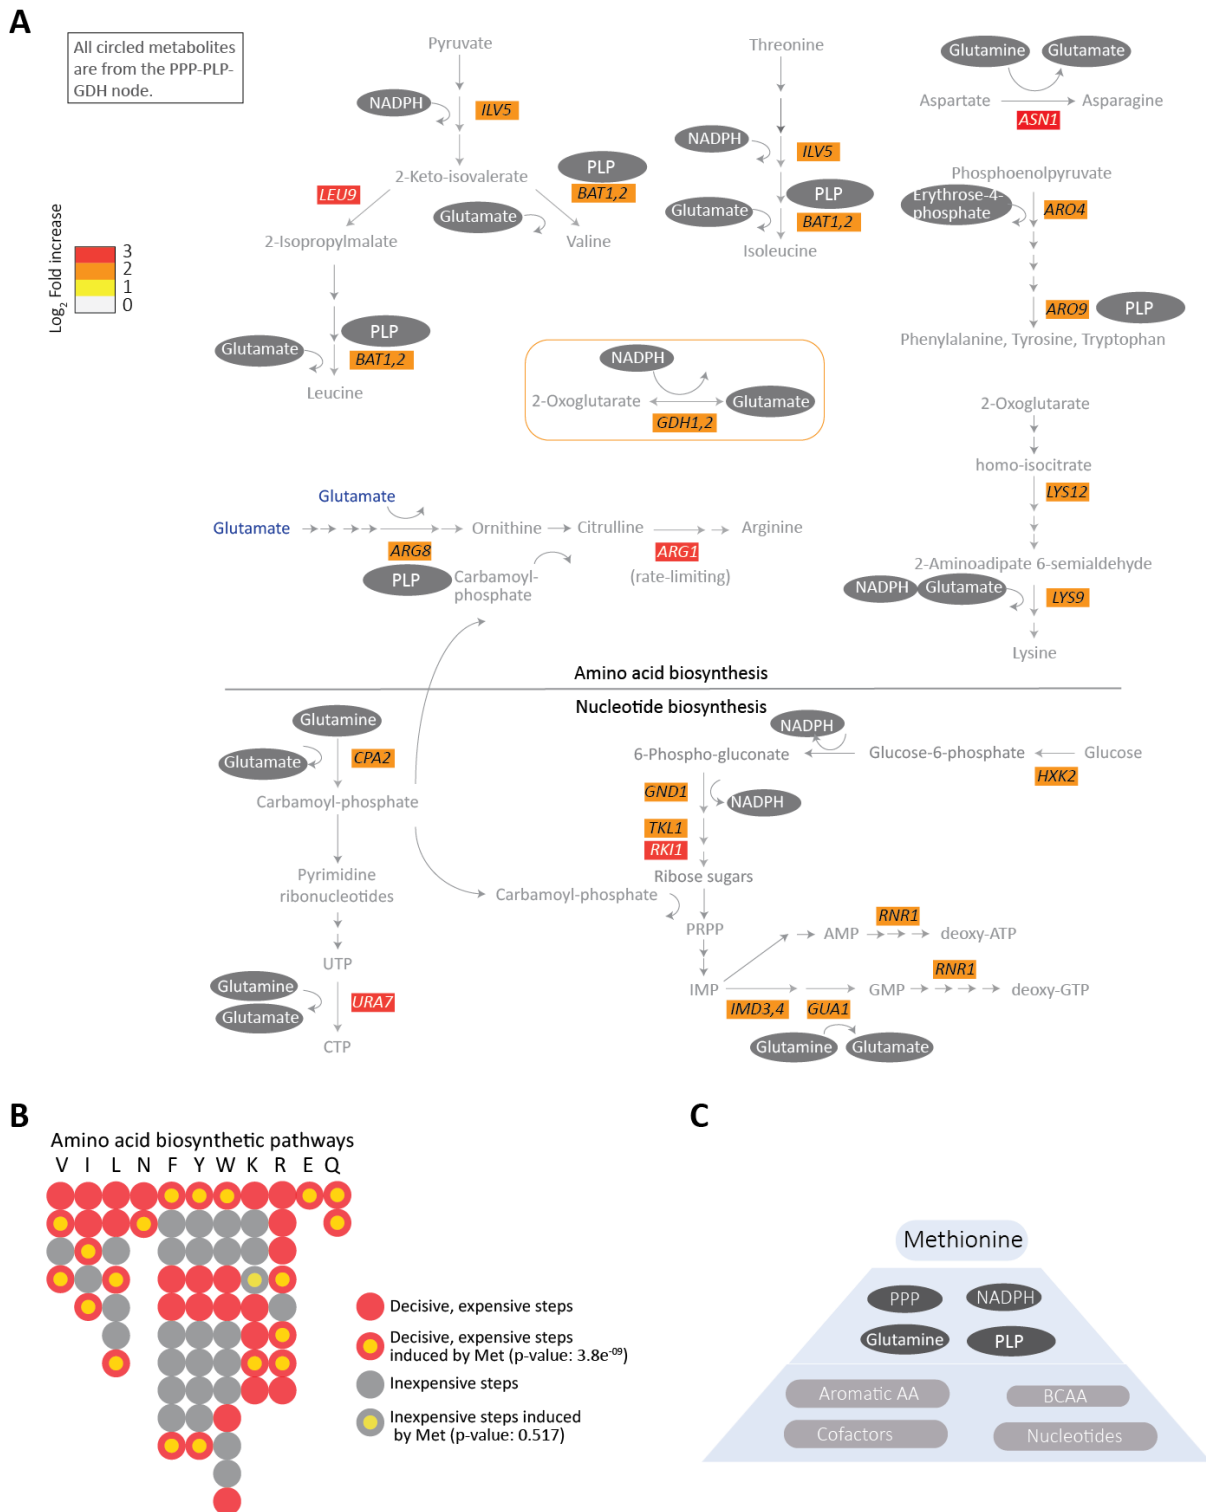

**Figure 2: Methionine sets-up a hierarchical metabolic response leading to anabolism.**

A) Regrouping of the methionine induced genes, focusing on those directly involved in amino acid and nucleotide metabolism. The schematic shows the methionine-responsive genes in various amino acid and nucleotide biosynthesis pathways, along with their fold-changes in gene expression. The requirement of PPP metabolites, NADPH, PLP or glutamate/glutamine (see Figure 1E) for the individual steps is mapped on to the schematic.



The arrows marked red are the steps induced in the presence of methionine. Note that all gene products induced by methionine in these pathways use PPP intermediates, NADPH, PLP and/or glutamine/glutamate (indicated within grey ovals) in their biochemical reactions.

B) A bird's eye-view of the amino acid biosynthesis steps regulated by methionine, with the metabolic costs associated with each step indicated. Each bead (or filled circle) represents a step in the pathway (prepared according to the individual amino acid pathways shown at <https://pathway.yeastgenome.org/>.) A step is considered expensive (marked red) when it is either the entry or the final or involves ATP utilization or involves reduction. All the rest of the steps are considered inexpensive (marked grey). Methionine induced steps are shown with a yellow fill at the centre of the circle, for the given step. The p-value for methionine dependence of genes encoding the critical, rate-limiting or costly steps in amino acid=  $3.8e^{-09}$ , and for the other nodes, it is non-significant (Fisher's exact test).

C) A hierarchical organization of the methionine mediated anabolic remodelling. Methionine induces expression of genes in the PPP-GDH-PLP node, which provides precursors for the key steps in the biosynthesis of all other amino acids and nucleotides, and these steps are also directly induced by methionine.

Figure 3

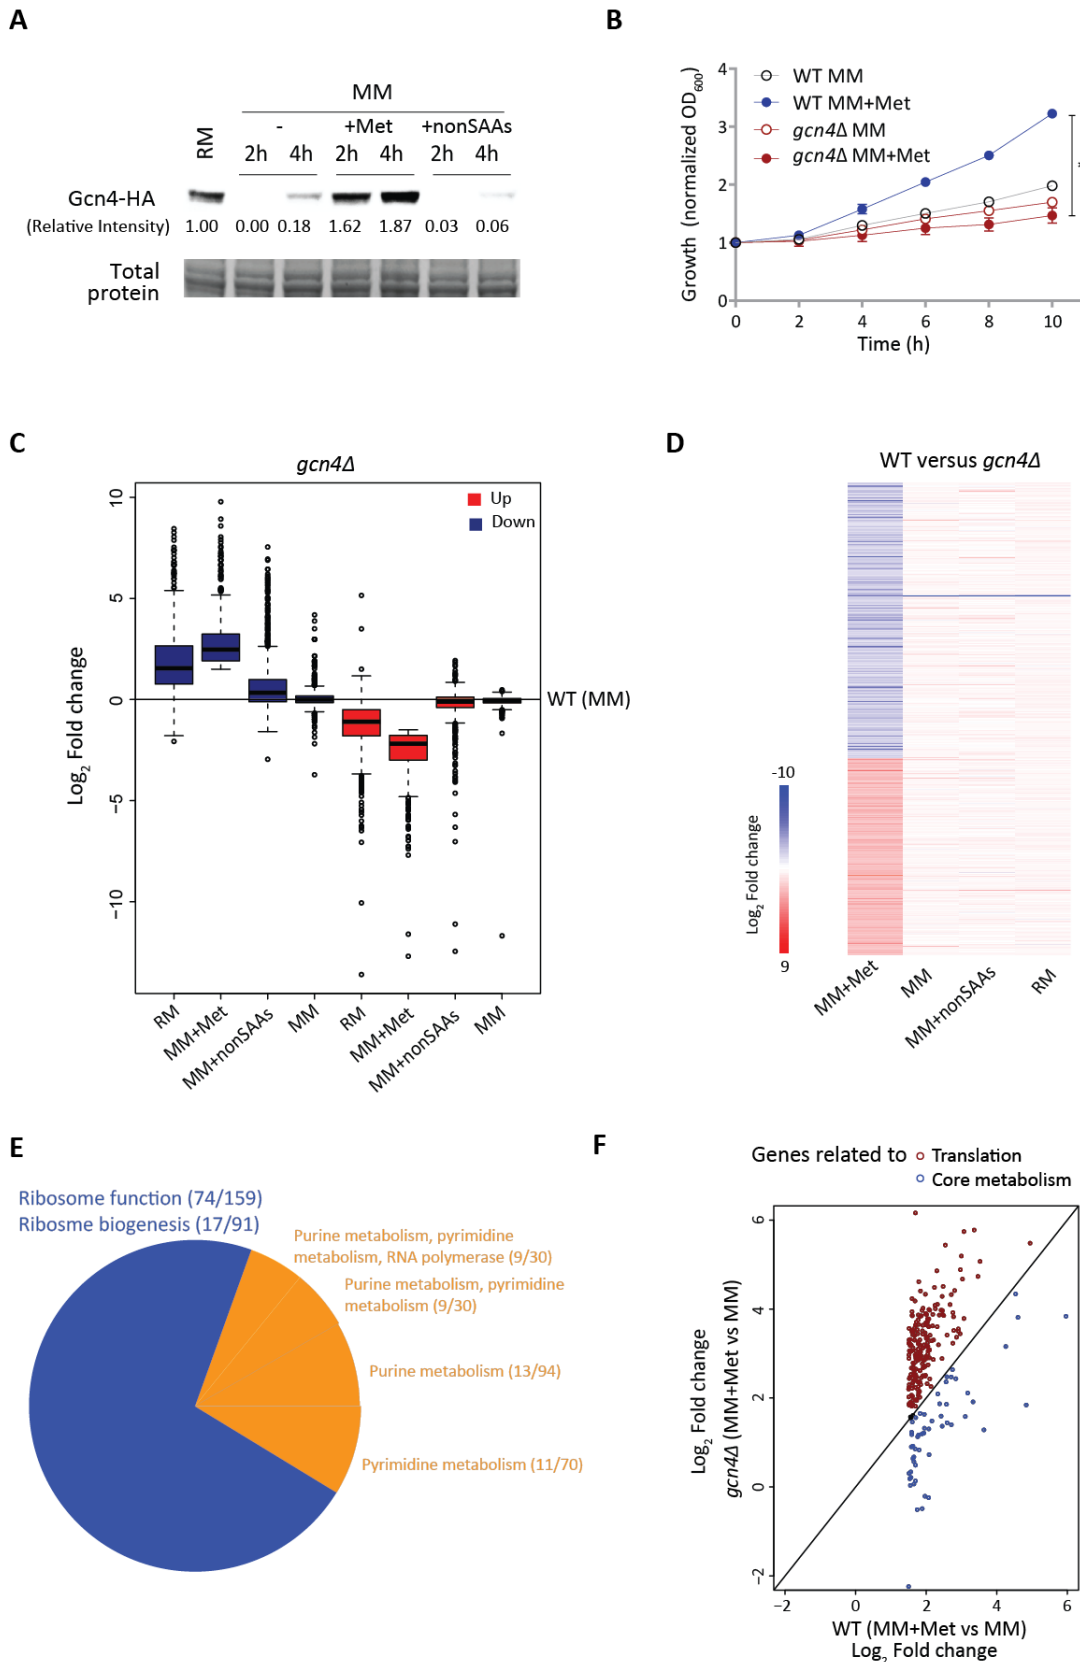

Figure 3: The core metabolic response induced by methionine is regulated by *GCN4*.

A) Gcn4p is induced by methionine. Gcn4p amounts were detected by Western blotting of WT cells (expressing Gcn4p with an HA epitope, tagged at the endogenous locus) shifted from RM to MM, or MM supplemented with the indicated combinations of amino acids. A representative blot is shown.

B) *GCN4* is necessary for methionine-mediated increased growth. WT and *gcn4Δ* cells were shifted from RM to MM with or without methionine supplementation and growth was monitored. Also see Figure S5B.

C) Trends of gene expression in RM and methionine supplemented MM in *gcn4Δ* cells. Gene expression levels of transcripts in *gcn4Δ* cells grown in RM or shifted to MM or MM plus methionine or MM plus nonSAAs were compared to WT MM set.

D) Global transcriptional response in the absence of *GCN4*. The heat map shows differentially expressed genes ( $\log_2$  1.5-fold change;  $p < 10^{-4}$ ) between WT and *gcn4Δ* cells in the respective growth conditions.

E) GO based analysis of the methionine-responsive genes in *gcn4Δ* cells. A pie chart showing the processes grouped by GO analysis for the up-regulated transcripts between MM plus methionine and MM set in *gcn4Δ* background. Numbers in the bracket indicate the number of genes from the query set/ total number of genes in the reference set for the given GO category.

F) The metabolic program is *GCN4* dependent. Categorization of the *GCN4* dependent transcripts in the presence of methionine, as related to metabolism, or translation. The expression level of the methionine-responsive transcripts related to metabolism and translation in WT set (MM plus methionine versus MM) was compared with the *gcn4Δ* background. The genes related to the metabolic steps described in Figures 1 and 2 are marked with blue circles, while genes related to ribosome biogenesis and function are marked with red circles.

In all panels, data shows mean $\pm$ SD. \*  $p < 0.05$ .

Figure 4

A

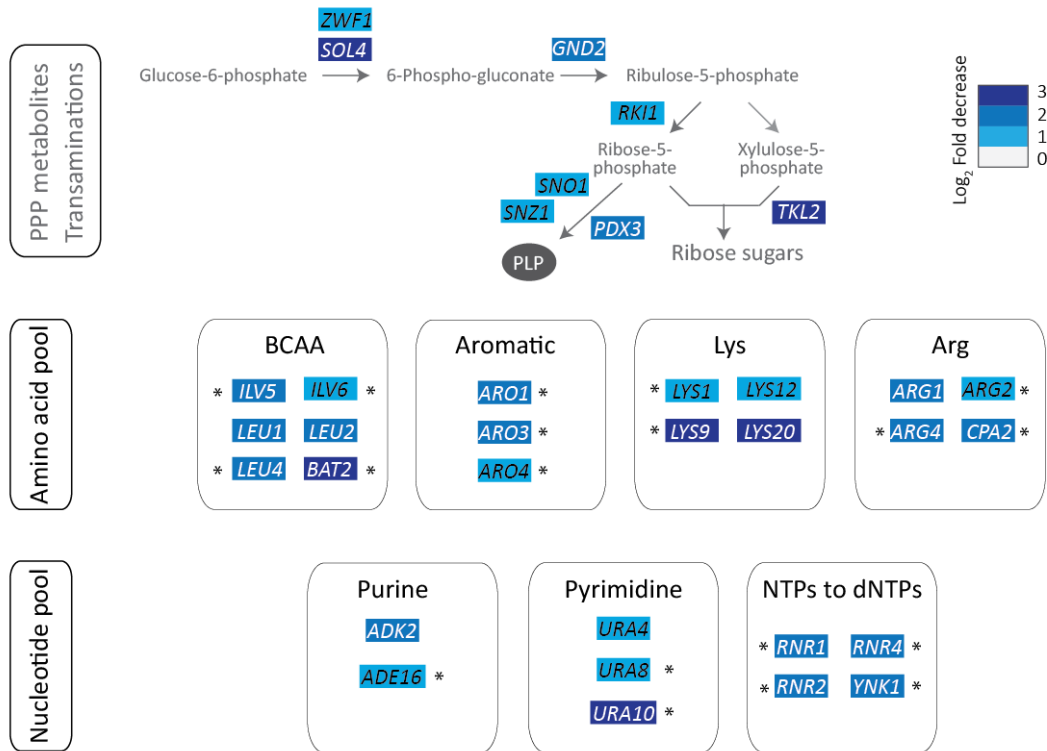

B

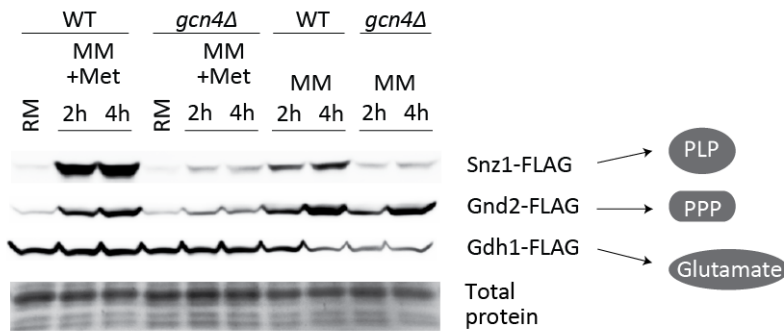

C

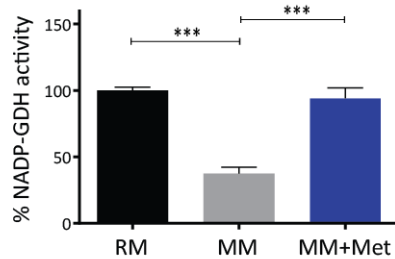

D

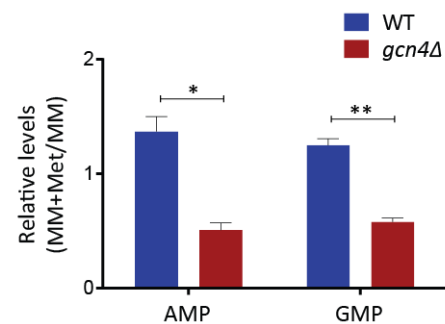

Figure 4: Methionine induced enzymes in amino acid and nucleotide biosynthesis are Gcn4p dependent.

A) *GCN4* regulates the metabolic program due to methionine. Regrouping of the *GCN4*-dependent genes based on the PPP-PLP-GDH dependent metabolic nodes. The schematic shows the *GCN4*-dependent genes (comparison of MM plus methionine set between WT and *gcn4Δ*) in the PPP, amino acid and nucleotide biosynthesis pathways, along with fold-changes in gene expression. The arrows marked blue in the PPP pathway are the steps down-regulated in *gcn4Δ* cells. The rate-limiting steps in the pathway are marked by asterisk.

B) Snz1p, Gnd2p and Gdh1p amounts in WT or *gcn4Δ* cells, with methionine as a variable. WT and *gcn4Δ* cells expressing FLAG-tagged Snz1p or Gnd2p or Gdh1p were shifted from RM to MM or MM plus methionine and amounts of these proteins were detected by Western blotting. A representative blot is shown in each case.

C) NADP-dependent glutamate dehydrogenase activity with methionine as a variable. Crude extracts of WT cells grown in RM and shifted to MM or MM plus methionine were analysed for intracellular biosynthetic NADP-glutamate dehydrogenase activity.

D) Relative nucleotide amounts in the presence of methionine in WT or *gcn4Δ* cells. WT and *gcn4Δ* cells grown in RM were shifted to MM (4h) with and without methionine, and the relative amounts of AMP and GMP from metabolite extracts of the respective samples were measured by LC-MS/MS.

In all panels data indicate mean±SD. \*  $p < 0.05$ , \*\*  $p < 0.01$ , \*\*\*  $p < 0.001$ .

Figure 5

A

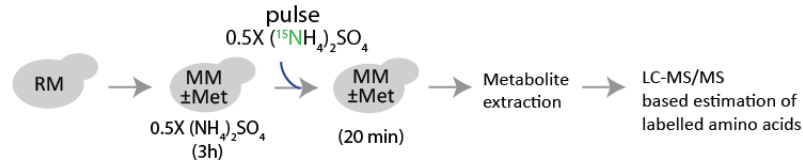

B

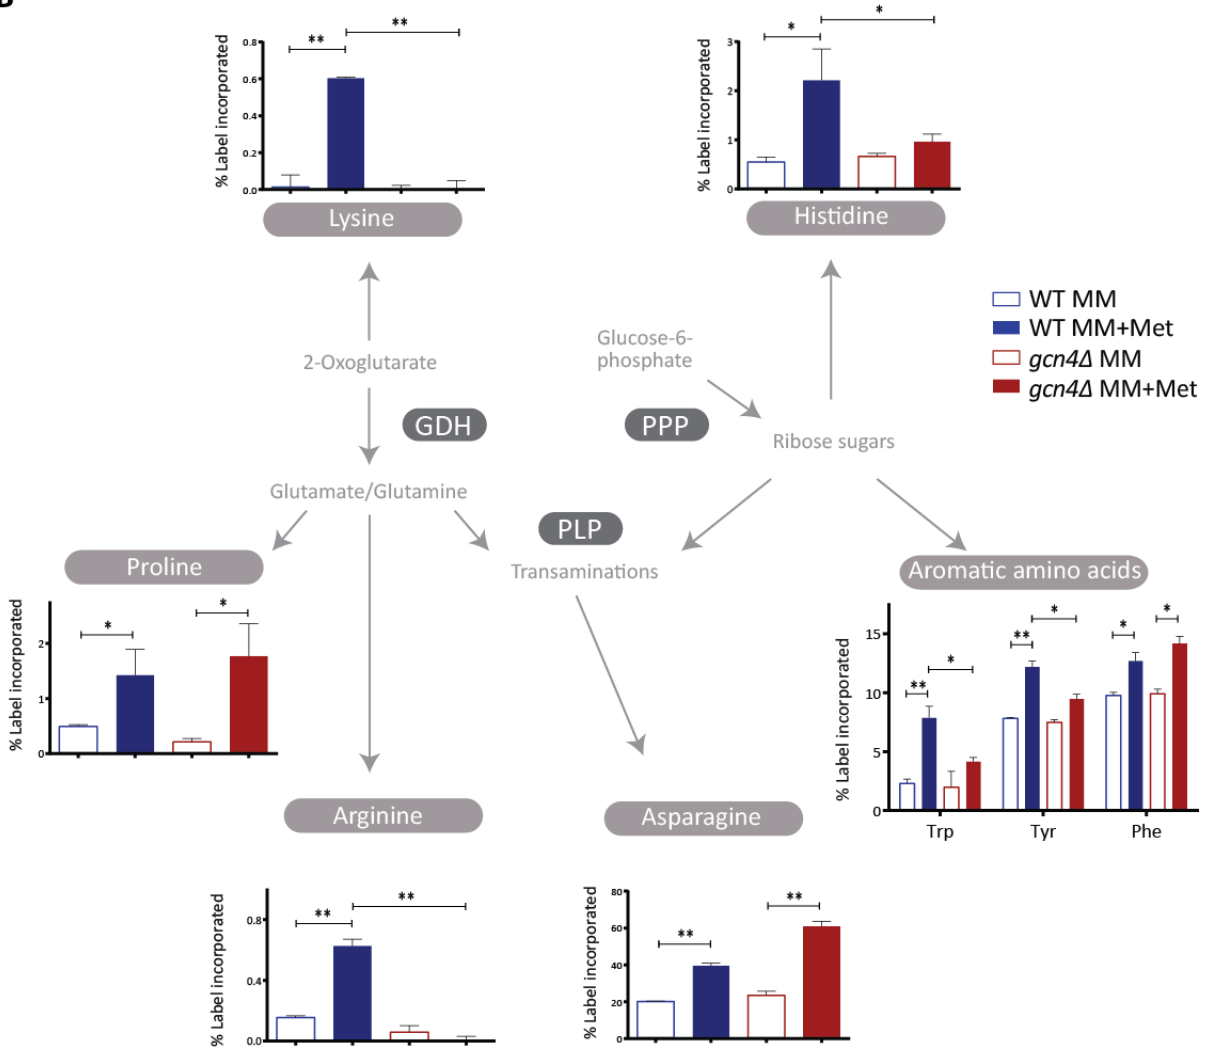

**Figure 5: Methionine increases amino acid biosynthesis *in vivo*.**

A) A schematic showing the experimental design of <sup>15</sup>N pulse-labelling experiment to measure amino acid biosynthetic flux. Cells were shifted to MM with and without methionine, maintained for 3h, and <sup>15</sup>N-ammonium sulfate was pulsed into the medium, and the indicated, labelled metabolites were measured. Also see Table S2.

B) Methionine increases amino acid biosynthesis in a Gcn4p dependent manner. <sup>15</sup>N label incorporation into newly synthesized amino acids in WT and *gcn4Δ* cells was measured, as shown in the panel A. For all the labelled moieties, fractional abundance of the label was calculated. Also see Table S2 for mass spectrometry parameters.

In all panels data indicate mean±SD. \* p < 0.05, \*\* p < 0.01.

Figure 6

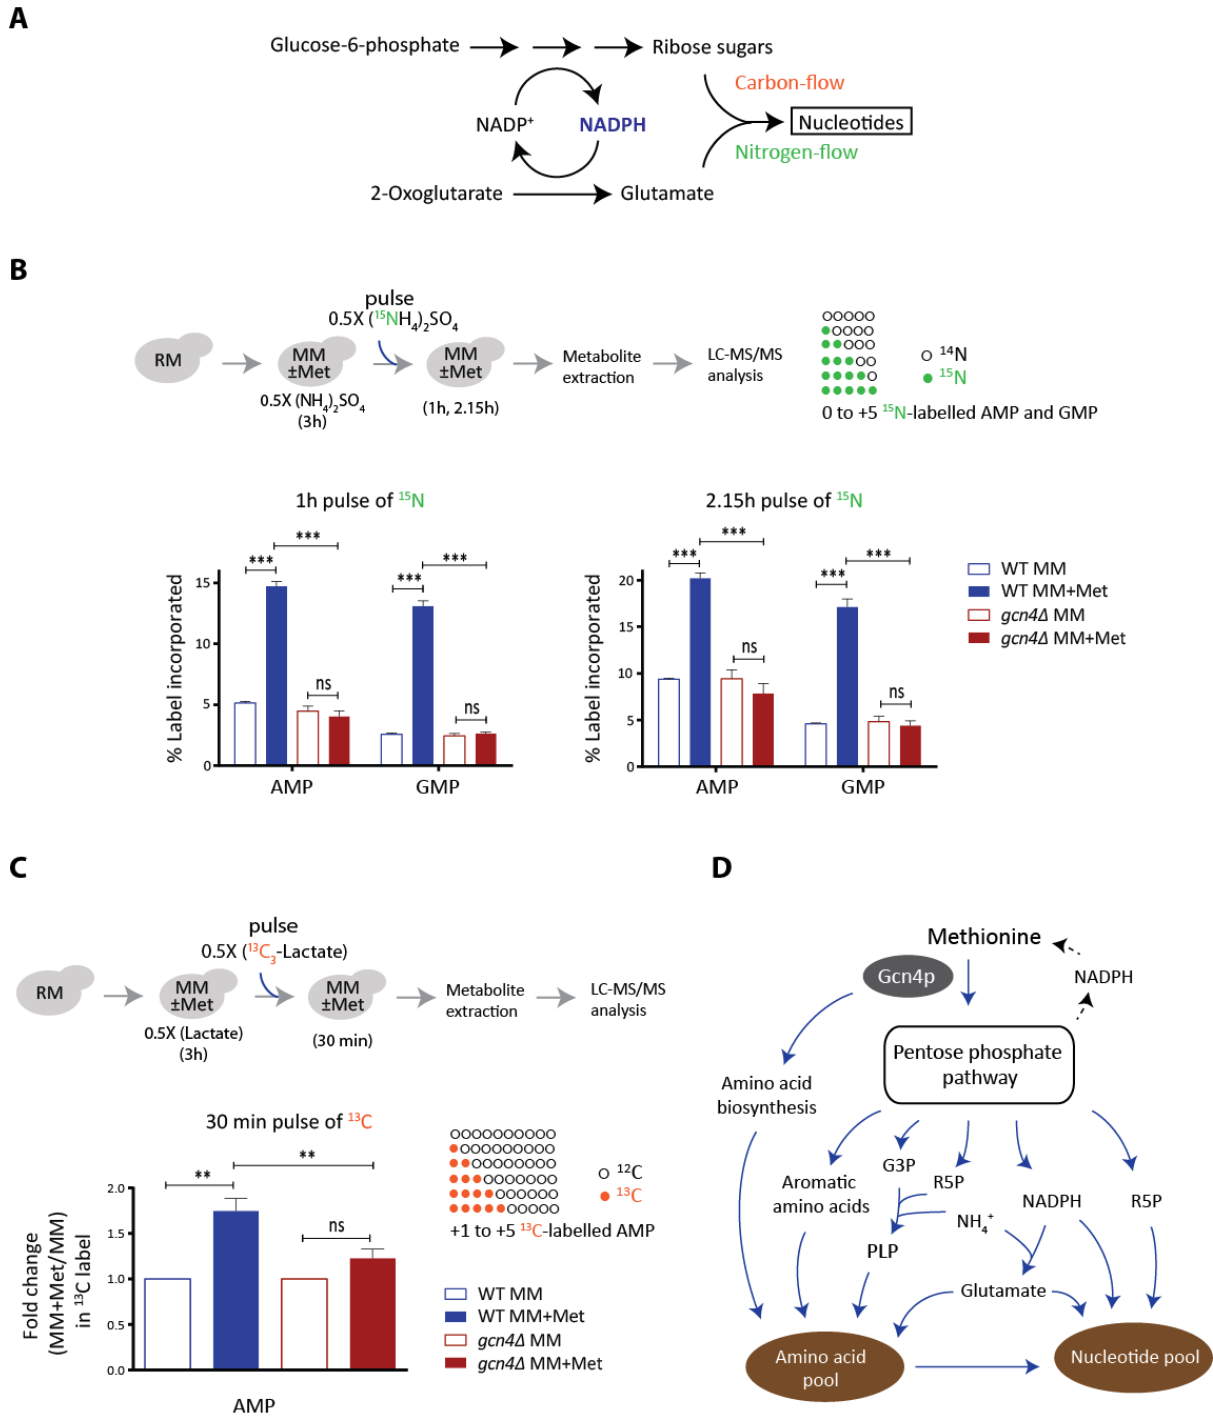

**Figure 6: Methionine increases nucleotide biosynthesis *in vivo*.**

A) A schematic showing carbon and nitrogen inputs in nucleotide biosynthesis, and their coupling to the PPP/NADPH metabolism.

B) Methionine increases nucleotide biosynthesis in a Gcn4p dependent manner. The WT and *gcn4Δ* cells treated and pulse-labelled with  $^{15}\text{N}$  ammonium sulfate as illustrated in the top panel. For all the labelled moieties, fractional increase of the incorporated label was

calculated, to measure newly synthesized AMP and GMP. (also see Figure S8 for CMP and UMP).

C) Methionine enhances carbon flux into AMP biosynthesis. An experimental set-up similar to the Panel B was employed, using  $^{13}\text{C}$ -lactate for carbon labelling. Label incorporation into nucleotides (from +1 to +5) was accounted for calculations. (note: GMP could not be estimated because of MS/MS signal interference from unknown compounds in the metabolite extract).

D) A model illustrating how methionine triggers an anabolic program leading to cell proliferation. Methionine promotes the synthesis of PPP metabolites, PLP, NADPH and glutamate (up-regulated genes in the pathways are shown in blue), which directly feed into nitrogen metabolism. As a result, methionine activates biosynthesis of amino acids and nucleotides, allowing the cells to grow in amino acid limiting medium.

In all panels data indicate mean $\pm$ SD. ns: non-significant difference, \*\*  $p < 0.01$ , \*\*\*  $p < 0.001$ .
